1 **Tomato fruit ripening factor NOR controls leaf senescence**

2

3 Xuemin Ma<sup>1,2</sup>, Salma Balazadeh<sup>1,2,\*</sup>, Bernd Mueller-Roeber<sup>1,2,\*</sup>

4

5 <sup>1</sup>Max Planck Institute of Molecular Plant Physiology, Am Mühlenberg 1, 14476 Potsdam-  
6 Golm, Germany; <sup>2</sup>University of Potsdam, Institute of Biochemistry and Biology, Karl-  
7 Liebknecht-Straße 24-25, Haus 20, 14476 Potsdam-Golm, Germany

8

9 ORCID IDs: 0000-0001-5690-7929 (X.M.); 0000-0002-5789-4071 (S.B.); 0000-0002-1410-  
10 464X (B.M.-R.).

11

12 **\*Corresponding authors:**

13 Bernd Mueller-Roeber; email: bmr@uni-potsdam.de

14 Salma Balazadeh; email: balazadeh@mpimp-golm.mpg.de

15

16 **Running title:** Tomato NOR controls leaf senescence

17

18 **One-sentence summary:**

19 The fruit ripening transcription factor NOR positively regulates leaf senescence in tomato by  
20 directly controlling the expression of key senescence-associated genes.

21

22 **Email addresses:**

23 XM: xma@mpimp-golm.mpg.de

24 SB: balazadeh@mpimp-golm.mpg.de

25 BMR: bmr@uni-potsdam.de

26

27 **Financial sources:**

28 This work was supported by the Max Planck Institute of Molecular Plant Physiology,  
29 Potsdam-Golm, Germany. X.M. received a fellowship from the China Scholarship  
30 Council (CSC; file no. 201306510001).

31

## 32 **Abstract**

33 NAC transcription factors (TFs) are important regulators of expressional reprogramming  
34 during plant development, stress responses and leaf senescence. NAC TFs also play important  
35 roles in fruit ripening. In tomato (*Solanum lycopersicum*), one of the best characterized NAC  
36 involved in fruit ripening is NON-RIPENING (NOR) and the *non-ripening* (*nor*) mutation has  
37 been widely used to extend fruit shelf life in elite varieties. Here, we show that NOR  
38 additionally controls leaf senescence. Expression of *NOR* increases with leaf age, and  
39 developmental as well as dark-induced senescence are delayed in the *nor* mutant, while  
40 overexpression of *NOR* promotes leaf senescence. Genes associated with chlorophyll  
41 degradation as well as senescence-associated genes (SAGs) show reduced and elevated  
42 expression, respectively, in *nor* mutants and *NOR* overexpressors. Overexpression of *NOR*  
43 also stimulates leaf senescence in *Arabidopsis thaliana*. In tomato, NOR supports senescence  
44 by directly and positively regulating the expression of several senescence-associated genes  
45 including, besides others, *SISAG15* and *SISAG113*, *SISGR1* and *SIYLS4*. Finally, we find that  
46 another senescence control NAC TF, namely SINAP2, acts upstream of *NOR* to regulate its  
47 expression. Our data support a model whereby NAC TFs have often been recruited by higher  
48 plants for both, the control of leaf senescence and fruit ripening.

49

50 **Keywords:** Aging, leaf, NAC, non-ripening, NOR, senescence, tomato, transcription factor

51

## 52 **Introduction**

53 Transcription factors (TFs) of the NAC (for NAM, ATAF1/2 and CUC2) family play  
54 important roles for development and the response of plants to abiotic and biotic stresses  
55 (Puranik *et al.*, 2012; Shao *et al.*, 2015). A prominent process controlled by NAC TFs is leaf  
56 senescence, which is a complex physiological process of nutrient recovery to support the  
57 development and growth of newly forming organs, including new leaves, flowers and seeds  
58 (Hendelman *et al.*, 2013; Zhong *et al.*, 2016). NAC TFs in diverse dicot and monocot plant  
59 species have been shown to control the onset and execution of senescence, e.g. in *Arabidopsis*  
60 *thaliana* (Guo and Gan, 2006; Kim *et al.*, 2009; Balazadeh *et al.*, 2010; Wu *et al.*, 2012;  
61 Balazadeh *et al.*, 2014; Garapati *et al.*, 2015; Kamranfar *et al.*, 2018), rice (*Oryza sativum*;  
62 Zhou *et al.*, 2013; Mao *et al.*, 2017), wheat (*Triticum aestivum*; Uauy *et al.*, 2006; Zhao *et al.*,  
63 2015), cotton (*Gossypium hirsutum*; Fan *et al.*, 2015), and tomato (*Solanum lycopersicum*;  
64 Lira *et al.*, 2017; Ma *et al.*, 2018).

65 A master positive regulator of leaf senescence in Arabidopsis is ORE1 (ORESARA1;  
66 ANAC092; Kim *et al.*, 2009; Balazadeh *et al.*, 2010). Expression of *ORE1* increases with leaf  
67 age, a process regulated at the transcriptional level by the *ORE1* promoter, and post-  
68 transcriptionally by microRNA *miR164* (Kim *et al.*, 2009). ORE1 controls the expression of a  
69 number of senescence-associated genes (SAGs) by directly binding to their promoters  
70 (Balazadeh *et al.*, 2010), and accordingly, overexpression or knocking out *ORE1* promotes or  
71 inhibits senescence, respectively (Kim *et al.*, 2009; Balazadeh *et al.*, 2010). Recently, the  
72 closest putative orthologs of *ORE1* in tomato (i.e. *SIOREIS02*, *SIOREIS03*, and *SIOREIS06*)  
73 were also shown to positively control leaf senescence (Lira *et al.*, 2017). In addition,  
74 inhibiting *SIOREIS02* by RNA interference (RNAi) not only delayed leaf senescence but also  
75 triggered an altered source-sink sugar partitioning resulting in an increased number of fruits  
76 per plant with elevated sugar levels (Lira *et al.*, 2017). Similarly, we recently showed that  
77 inhibiting expression of the *SINAP2* transcription factor in transgenic tomato plants delays  
78 leaf senescence, which was accompanied by an increased yield of fruits (with elevated sugar  
79 content) likely due to extended photosynthesis in aging plants (Ma *et al.*, 2018). *SINAP2*  
80 belongs to the NAP clade of NAC transcription factors of which *AtNAP* from Arabidopsis  
81 was first studied with respect to leaf senescence (Guo and Gan, 2006) and was later shown to  
82 also control silique senescence (Kou *et al.*, 2012). In rice, inhibiting *OsNAP1* delayed leaf  
83 senescence but increased seed yield (Liang *et al.*, 2014).

84 In addition, NAC TFs have been reported, or suggested, to be involved in ripening of fleshy  
85 fruits in several species, with a particular emphasis on tomato, an important fleshy fruit-  
86 bearing crop that is extensively used as a model vegetable for studies on fruit physiology and  
87 development; its nuclear genome has been sequenced (Tomato Genome Consortium, 2012).  
88 One of the best characterized examples in tomato is NON-RIPENING (NOR), which also  
89 affects fruit shelf life, an important economic trait. Mutations in the *NOR* gene (locus  
90 *Solyc10g006880*) lead to the formation of a truncated TF protein (*nor* mutant) or a NAC TF  
91 with a single amino acid substitution (*alcobaca* mutant, *alc*) (Giovannoni *et al.*, 2004; Casals  
92 *et al.*, 2012). Recently, a further mutation of the *NOR* gene, leading to an early stop codon,  
93 was identified in the tomato variety Penjar-1 grown in the Mediterranean area (Kumar *et al.*,  
94 2018). NOR acts upstream of ethylene synthesis and thereby controls fruit ripening (Barry  
95 and Giovannoni, 2007). CHIP assays demonstrated that *NOR* is a direct downstream target of  
96 RIN (Ripening Inhibitor), a MADS-box TF controlling fruit ripening (Martel *et al.*, 2011;  
97 Fujisawa *et al.*, 2013). Similarly, in melon (*Cucumis melo*), a NOR transcription factor  
98 (CmNAC-NOR) was found to be involved in fruit ripening (Rios *et al.*, 2017). In addition,

99 *NOR* homologs control senescence in non-flesh fruits like the siliques of *Arabidopsis* where  
100 *NARS1/NAC2* and *NARS2/NAM* redundantly and positively regulate silique senescence while  
101 leaf senescence is unaltered compared to wild type, indicating organ-specific functions of the  
102 two NAC TFs (Kunieda *et al.*, 2008).

103 Besides *NOR*, other TFs of the NAC family in tomato have been reported to control fruit  
104 ripening, including *SINAC4* which positively regulates ripening, possibly through physical  
105 interaction with *NOR* and *RIN* (shown by yeast two-hybrid studies); furthermore, *SINAC4*  
106 was suggested to act as an upstream regulator of *RIN* (Zhu *et al.*, 2014). Evidence for a  
107 positive role in regulating fruit ripening was also obtained for *SINAC48* and *SINAC19* (which  
108 is identical to *SINAP2*) using a virus-induced gene silencing (VIGS) approach. The data  
109 suggest that both TFs *SLNAC47* and *SINAC48* act by affecting ethylene biosynthesis and  
110 signaling (Kou *et al.*, 2016). *SINAC3* shows high expression in fruits and is involved in seed  
111 development (Han *et al.*, 2012; Han *et al.*, 2014).

112 Evidence for an involvement of NAC TFs in fleshy fruit ripening was also obtained from  
113 studies performed on developing and ripening fruits of different other species, including the  
114 octoploid strawberry cultivar *Fragaria x ananassa* (Moyano *et al.*, 2018), the Chilean  
115 endemic strawberry *Fragaria chiloensis* (Carrasco-Orellana *et al.*, 2018), and bilberry  
116 (*Vaccinium myrtillus*; Nguyen *et al.*, 2018).

117 Taken together, many NAC TFs have been reported to control leaf senescence in different  
118 plant species, and some NACs have been firmly proven - or suggested - to control the  
119 ripening of fleshy or dry fruits. Considering this, we were interested to investigate whether the  
120 so-far best studied fruit ripening control NAC TF in tomato, namely *NOR*, additionally  
121 controls leaf senescence in this plant. Our data show that *NOR* acts as a positive  
122 transcriptional regulator of leaf senescence by directly and positively controlling the  
123 expression of several chlorophyll degradation- (CDGs) and senescence-associated genes  
124 (SAGs) in this species. The data suggest an evolutionary recruitment of NAC TFs from  
125 regulating leaf senescence towards the control of physiology during fruit ripening.

126

## 127 **Materials and methods**

128

### 129 **General**

130 Tomato orthologs of *Arabidopsis* genes were identified using the PLAZA 3.0 database  
131 (<http://bioinformatics.psb.ugent.be/plaza/>; Proost *et al.*, 2015). Genes were annotated using  
132 the PLAZA 3.0 and Sol Genomics (<https://solgenomics.net/>) databases, and using information

133 extracted from the literature. Oligonucleotide sequences are given in **Table S1**. qRT-PCR  
134 primers were designed using QuantPrime ([www.quantprime.de](http://www.quantprime.de); Arvidsson *et al.*, 2008).

135

### 136 **Plant material and growth conditions**

137 Tomato (*Solanum lycopersicum* L., cultivar MoneyMaker) was used as the wild type (WT).  
138 The *nor* mutant is in the Rutgers genetic background (Tomato Genetics Research Center,  
139 accession LA3013). Seeds were germinated on full-strength Murashige–Skoog (MS) medium  
140 containing 2% (w/v) sucrose and 3-week-old seedlings were transferred to soil containing a  
141 mixture of potting soil and quartz sand (2:1, v/v). Plants were grown in a growth chamber at  
142 500  $\mu\text{mol photons m}^{-2} \text{s}^{-1}$  and 25°C under a 14/10-h light/dark regime in individual pots (18  
143 cm diameter). For experiments with *Arabidopsis thaliana* (L.) Heynh., accession Col-0 was  
144 used as the control. Seeds were germinated in soil (Einheitserde GS90; Gebrüder Patzer,  
145 Sinntal-Altengronau, Germany) in a climate-controlled chamber with a 16-h day length  
146 provided by fluorescent light at approximately 100  $\mu\text{mol m}^{-2} \text{s}^{-1}$ , day/night temperature of  
147 20°C/16°C, and relative humidity of 60%/75%. After 2 weeks, seedlings were transferred to a  
148 growth chamber with a 16-h day (80 or 120  $\mu\text{mol m}^{-2} \text{s}^{-1}$ ), day/night temperature of  
149 22°C/16°C, and 60%/75% relative humidity.

150

### 151 **DNA constructs**

152 Primer sequences are listed in **Table S1**. Amplified fragments generated by PCR were  
153 sequenced by Eurofins MWG Operon (Ebersberg, Germany). For *35S:NOR-GFP*, the full-  
154 length *NOR* open reading frame was amplified without its stop codon. The PCR product was  
155 cloned into the pENTR/D-TOPO vector using the pENTR Directional TOPO Cloning kit  
156 (Invitrogen). The sequence-verified entry clone was then transferred to the pK7FWG2 vector  
157 (Karimi *et al.*, 2002) by LR recombination (Invitrogen). For *NOR-IOE*, the *NOR* coding  
158 sequence was cloned into the pER10 vector (Zuo *et al.*, 2002) made GATEWAY-compatible.  
159 Constructs were transformed into tomato cv. MoneyMaker using *Agrobacterium tumefaciens*  
160 GV2260, or into Arabidopsis using *A. tumefaciens* GV3101 (pMP90).

161 To construct *NOR-CELD*, the DBP-CELD fusion vector pTacLCELD6XHis was used (Xue,  
162 2005). The *NOR* coding sequence (without stop codon) was amplified by PCR with a sense  
163 primer (including an *NheI* restriction site) and an antisense primer (including a *BamHI*  
164 restriction site) (**Table S1**). The amplified DNA fragment was first inserted into pCR2.1  
165 (Thermo Fisher Scientific) and then inserted N-terminal of CELD using the *NheI* and *BamHI*  
166 cloning sites of pTacLCELD6XHis to create an in-frame fusion.

167

## 168 **Treatments**

169 For estradiol induction, 3-week-old *NOR-IOE* seedlings were incubated in sterile water  
170 containing 15  $\mu$ M estradiol (control treatment: 0.15% [v/v] ethanol). The seedlings were kept  
171 on a rotary shaker for 6 hours and then immediately frozen in liquid nitrogen. For dark-  
172 induced leaf senescence experiments, detached young leaves from 10-week-old WT and *NOR*  
173 transgenic plants were placed on moisturized filter papers in Petri dishes with the adaxial side  
174 facing upwards. The plates were kept in darkness at 22°C for two weeks. Filter papers were  
175 changes every five days. Gene expression levels were determined by qRT-PCR.

176

## 177 **Gene expression analysis**

178 Total RNA was extracted using Trizol reagent (Life Technologies). Synthesis of  
179 complementary DNA and qRT-PCR using SYBR Green were performed as described  
180 (Balazadeh *et al.*, 2008). PCR was performed using an ABI PRISM 7900HT sequence  
181 detection system (Applied Biosystems). GAPDH (*Solyc04g009030*) served as reference gene  
182 for data analysis. Statistical significance was determined using Student's *t* test.

183

## 184 **DNA-binding site selection**

185 *In vitro* binding site selection was performed using the CELD-fusion method with the  
186 pTacNOR-LCELD6xHis construct, employing biotin-labeled double-stranded  
187 oligonucleotides (Xue, 2005). The DNA binding activity of NOR-CELD was measured using  
188 methylumbelliferyl  $\beta$ -D-cellobioside as substrate (Xue, 2002). DNA binding assays with a  
189 biotin-labeled single-stranded oligonucleotide or a biotin-labeled double-stranded  
190 oligonucleotide without a target binding site were used as controls.

191

## 192 **Chromatin immunoprecipitation (ChIP)**

193 ChIP-qPCR was performed from leaves of mature *35S:NOR-GFP* plants, and wild type (WT)  
194 served as control. ChIP was performed as described (Kaufmann *et al.*, 2010) using anti-GFP  
195 antibody to immunoprecipitate protein-DNA complexes. qPCR primers were designed to  
196 flank the NOR binding sites within the promoter regions of potential target genes. Primers  
197 annealing to a promoter region of *Solyc04g009030* lacking a NOR binding site were used as a  
198 negative control. Primers used for qPCR are listed in **Table S1**.

199

## 200 **Chlorophyll measurements**

201 Chlorophyll content was determined using a SPAD analyser (N-tester; Hydro Agri).  
202 Alternatively (**Figure 4D**), frozen leaf powder was suspended in 5 mL 80% (v/v) acetone in  
203 water and homogenized for 1 min. Chlorophyll content was determined with a  
204 spectrophotometer at 663 and 646 nm as described by Arnon (1949).

205

### 206 **Ion leakage measurement**

207 Membrane damage during senescence was estimated by measuring ion leakage in control and  
208 dark-treated leaves of WT and *NOR*-transgenic plants as reported in Thirumalaikumar *et al.*  
209 (2018).

210

### 211 **Accession numbers**

212 Sequence data from this article can be found in the GenBank/EMBL data libraries under the  
213 following accession numbers: *NOR* (NM\_001247723.2); *SINAC3* (NM\_001279348.2);  
214 *SINAP2* (XM\_004236996.2); *SISAG15* (XM\_010320381.2); *SISAG113* (XP\_004239911.1);  
215 *SISGR1* (NP\_001234723.1); *SIPPH* (XM\_004229633.3); *SIPAO* (NP\_001234535.2); *SIYLS4*  
216 (XM\_004245218); *SIERT1B* (NM\_001361347); *SIKFB20* (XM\_010320257); *SLBCG40*  
217 (XP\_004247842.1).

218

## 219 **Results**

220

### 221 ***NOR* is upregulated during leaf senescence**

222 *NOR* encodes a tomato NAC transcription factor that harbors a conserved, DNA-binding  
223 NAM at its N-terminus (**Figure 1A**). At the protein level, *NOR* is closely related to *SINAC3*  
224 from tomato, and to *NARS1* and *NARS2* from Arabidopsis (**Figure 1B**). To test the  
225 subcellular localization of *NOR* we expressed it as a fusion to green fluorescence protein  
226 (GFP) in transgenic tomato plants, under the control of the cauliflower mosaic virus (CaMV)  
227 *35S* promoter. As shown in **Figure 1C**, *NOR*-GFP fusion protein accumulated in nuclei, as  
228 expected for a transcription factor. *NOR* is hardly expressed in young leaves, but its  
229 expression increased during developmental and dark-induced senescence (**Figure 1D, E**),  
230 indicating a possible function of the tomato transcription factor for regulating leaf senescence.

231

### 232 ***NOR* promotes leaf senescence**

233 To test whether *NOR* indeed regulates leaf senescence, we first generated transgenic tomato  
234 (*Solanum lycopersicum* cv. 'MoneyMaker') plants constitutively expressing *NOR* under the

235 control of the CaMV 35S promoter. We selected two lines (hereafter, *OX-L5* and *OX-L19*;  
236 **Figure S1A**) for further analysis. Notably, *NOR* overexpression lines showed early leaf  
237 senescence, while their stems were also typically shorter than those of wild-type (WT) plants  
238 (**Figure 2A**). The ratio of yellow leaves (defined as leaves with more than 50% yellowing) to  
239 all leaves of 12-week-old *OX* plants was significantly higher in *OX-L5* and *OX-L19* plants  
240 than the WT (**Figure 2B**). Furthermore, the chlorophyll content of leaves from the same  
241 position (leaf no. 3) dropped faster during development in *OX* than WT (**Figure 2C**). We also  
242 observed a generally reduced shoot height of *NOR* overexpressors compared to the WT, while  
243 the *nor* mutant appeared slightly taller under our growth conditions (**Figure 2A**).

244

### 245 **The tomato *nor* mutants exhibits retarded leaf senescence**

246 Dark treatment is an efficient way to induce senescence in plants, as shown in many reports  
247 (Biswal and Mohanty, 1976; Chen and Kao 1991; Weaver *et al.*, 2001). We therefore  
248 examined the phenotypes of tomato *nor*, WT, and *OX-L19* plants after 14 days of dark  
249 treatment. Detached leaves from the overexpression line showed earlier de-greening in  
250 extended darkness than the WT. In contrast, leaves of the *nor* mutant remained longer green in  
251 darkness and their chlorophyll content remained high after treatment compared to WT and  
252 *OX-L19* (**Figure 3A, B**). Moreover, ion leakage, an indicator of membrane damage, was  
253 significantly elevated in *OX-L19* compared to WT, while it was reduced in *nor* (**Figure 3C**).  
254 In accordance with this, expression of various senescence-associated genes (SAGs) and  
255 chlorophyll degradation genes (CDGs) was upregulated in *OX-L19* plants compared to wild  
256 type, but downregulated in *nor* (**Figure 3D; Table S2**).

257 To further examine the function of *NOR* in regulating senescence, we generated *NOR* knock-  
258 down lines by artificial microRNA (*ami-NOR*), in tomato cultivar Moneymaker. The *ami-*  
259 *NOR* construct targets 21 nucleotides (TGTACCATAGTTTGAAGGCTG) around 200 bp  
260 close to 3' end of the *NOR* coding sequence. This region encodes the transactivation domain  
261 of the TF. We selected two lines (*ami-L2* and *ami-L35*) with a reduced *NOR* transcript  
262 abundance as determined by end-point PCR (**Figure S2A**). The *ami-NOR* lines exhibited  
263 delayed senescence during dark treatment, similar to the *nor* mutant (**Figure S2B and S2C**).

264

### 265 ***NOR* promotes leaf senescence in *Arabidopsis***

266 To test whether *NOR* also induced early leaf senescence in a heterologous species, we  
267 overexpressed it in transgenic *Arabidopsis thaliana* plants. We selected two *Arabidopsis* lines  
268 expressing *NOR* for further analysis (hereafter, *OX-L6* and *OX-L8*; **Figure 4A**). As in tomato,



269 overexpression of *NOR* promoted early leaf senescence in Arabidopsis (**Figure 4A**),  
270 indicating functional conservation across species. *OX* plants had a higher ratio of yellow to all  
271 leaves than the WT at the same age (5 weeks) (**Figure 4B**).

272 To test whether *NOR* overexpression promotes senescence in darkness, we detached leaves  
273 from the Arabidopsis *OX-L6* and *OX-L8* lines and after 6 days of dark incubation observed  
274 much stronger senescence than in leaves of the WT control (**Figure 4C**). Chlorophyll content  
275 after dark treatment was more strongly reduced in these lines than the WT (**Figure 4D**).  
276 Expression of the senescence-associated marker gene *AtSAG12* (Noh and Amasino, 1999) was  
277 significantly upregulated in these lines in comparison to WT (**Figure 4E**). From these results,  
278 we conclude that *NOR* positively regulates leaf senescence in both, tomato and Arabidopsis.

279

### 280 **Identification of the consensus DNA binding sequence of NOR**

281 Knowledge about the DNA binding motif(s) of a TF under analysis strongly assists in  
282 unraveling the wider gene regulatory network it controls. We therefore performed an *in vitro*  
283 binding site selection assay using the earlier reported cellulose D (CELD) fusion method  
284 (Xue, 2005) to identify *NOR* binding sites. We first analyzed the binding activity of *NOR*  
285 toward 16 randomly selected TaNAC69 motifs, S1 - S16, bound by the NAC69 transcription  
286 factor from wheat (*Triticum aestivum*) (**Figure S3A**). Previously, it was shown that S1 is a  
287 high-affinity binding sequence of TaNAC69 (Xue *et al.*, 2006). In our results, *NOR* showed  
288 strong binding affinity to S1, with affinity decreasing progressively with substitutions.  
289 Overall, *NOR* bound to TaNAC69-selected motifs containing the YACG (or CGTR) core  
290 sequence (**Figure S3A**). Further analysis of the specificity of binding through base  
291 substitution, insertion, or deletion revealed that the mutation of nucleotides in the core motifs  
292 (e.g., S1m3 and S1m9) resulted in a strong reduction of *NOR* binding activity (**Figure S3B**).  
293 Taken together, our data suggest two high-affinity binding sites of *NOR*, CG(Y/C)(G/C)(5-  
294 7n)N(A/G)CGn(A/C/G)(A/C/T) and (C/T)ACGn(A/C)(A/T)(C/G/T)(C/T), as motif I and  
295 motif II, respectively.

296

### 297 **Identification of NOR target genes**

298 Although *NOR* is a transcription factor well known for its function in fruit ripening, no direct  
299 target genes have to our knowledge been reported so far. Therefore, based on the results  
300 presented in **Figure 3D**, we selected individual genes for further analysis to test whether they  
301 might be direct downstream targets of *NOR*. To this end, we chose several genes harboring  
302 the *NOR* binding site within their 5' upstream regulatory regions, including *SISAG15*,

303 *SISAG113*, *SISGR1*, *SIPPH*, and *SIPAO* (**Figure 5A**). Chromatin-immunoprecipitation/  
304 quantitative real-time PCR (ChIP-qPCR) revealed direct binding of the NOR transcription  
305 factor to the promoters of all genes except *SIPAO* (**Figure 5B**).

306 We next selected additional genes known to be regulated by natural or dark-induced  
307 senescence in tomato, or induced by abiotic stresses that trigger senescence (based on  
308 literature reports) and checked whether their promoters harbor a NOR binding site.  
309 Considering that NOR regulates fruit ripening (Giovannoni *et al.*, 2004; Casals *et al.*, 2012;  
310 Kumar *et al.*, 2018) we also included a few genes reported to control this process. We then  
311 tested whether expression of these genes is affected in transgenic tomato plants expressing the  
312 NOR transcription factor under the control of an estradiol (EST)-inducible promoter  
313 (hereafter, *NOR-IOE*). As shown in **Figure S1B**, expression of *NOR* was strongly enhanced in  
314 three-week-old *NOR-IOE* seedlings 6 hours after treatment with 15  $\mu$ M EST, as expected.  
315 Similarly, all selected NOR-binding site-containing genes except two showed enhanced  
316 expression when *NOR* was induced (**Figure 6A; Table S2**).

317 Among the genes upregulated by NOR are the senescence-related genes *SIYLS4*, *SIKFB20*,  
318 and *SISRGI*. *SIYLS4* (*Solyc08g068330*), a homolog of Arabidopsis *YLS4* (*YELLOW LEAF*  
319 *SPECIFIC4*), is expressed in a senescence-specific manner; the gene encodes an aspartate  
320 aminotransferase possibly involved in remobilizing leaf nitrogen during senescence (Yoshida  
321 *et al.*, 2001). *SIKFB20* (*Solyc03g120320*), a gene induced in tomato leaves during senescence,  
322 is a homolog of Arabidopsis *ATIG80440*, which encodes a kelch-repeat F-box protein  
323 targeting type-B ARR (Arabidopsis Response Regulator) proteins for degradation in the  
324 negative regulation of the cytokinin response (Kim *et al.*, 2013a; Kim *et al.*, 2013b). Notably,  
325 cytokinins delay senescence (Hwang *et al.*, 2012). *SISRGI* (*Solyc02g071430*) is closely  
326 related to *SENESCENCE-RELATED GENE1* (*SRGI*) from Arabidopsis, which encodes a  
327 member of the Fe (II)/ascorbate oxidase gene family and is highly induced at low-nitrogen  
328 condition and during sucrose-induced senescence (Pourtau *et al.*, 2006). *SIABCG40*  
329 (*Solyc09g091670*), which encodes a protein belonging to the ATP binding cassette (ABC)  
330 transporters, is one of the most upregulated genes after EST treatment. It is induced by more  
331 than 120-fold after induction of *NOR* with EST in *NOR-IOE* lines. In Arabidopsis, *ABCG40*  
332 encodes an ATP binding cassette (ABC) transporter protein involved in the cellular uptake of  
333 abscisic acid (ABA; Kang *et al.*, 2010), a phytohormone that triggers stomatal closure upon  
334 water shortage and stimulates leaf senescence in various species (Zhang *et al.*, 2012; Zhao *et*  
335 *al.*, 2017).

336 Three other genes analyzed, namely *SIERT1B*, *SIADH2*, and *SIACS2*, are involved in fruit  
337 ripening, and all are upregulated after EST treatment in *NOR-IOE* plants. *SIERT1B*  
338 (*Solyc10g085230*), encodes a putative UDP-glycosyltransferase potentially involved in  
339 glycoalkaloid biosynthesis in tomato fruits (Itkin *et al.*, 2013; Alseekh *et al.*, 2015). *SIADH2*  
340 (*ALCOHOL DEHYDROGENASE2*; *Solyc06g059740*) participates in the biosynthesis of  
341 volatiles and, accordingly, its transcript abundance increases during fruit ripening (Speirs *et*  
342 *al.*, 1998); it is a direct target of RIN (Qin *et al.*, 2012). *SIACS2* (*1-AMINOCYCLOPROPANE-*  
343 *1-CARBOXYLATE SYNTHASE2*; *Solyc01g095080*) encodes an ethylene biosynthesis gene  
344 highly expressed during fruit ripening. Downregulation of *SIACS2* lowers ethylene production  
345 and delays fruit ripening (Oeller *et al.*, 1991). In addition, expression of *SIACS2* is largely  
346 dependent on transcription factor RIN, which is a direct upstream regulator of it (Martel *et al.*,  
347 2011).

348 We included further genes with likely functions in fruit ripening or leaf senescence in our  
349 analysis. One is *SICEL7* (*Solyc11g040340*), which encodes a putative endo- $\beta$ -1,4-glucanase of  
350 the glycosyl hydrolase 9 (cellulase E) family (www.uniprot.org); *SICEL7* has been suggested  
351 to play a specific role for regulating the loosening of cells walls during fruit growth (Catalá *et*  
352 *al.*, 2000). As seen in **Figure 6A** (and **Table S2**), expression of *SICEL7* was significantly  
353 elevated in *NOR-IOE* plants after EST induction, suggesting it to be a downstream target of  
354 NOR. In addition, the hormone-related genes *ETHYLENE-RESPONSIVE TRANSCRIPTION*  
355 *FACTOR B.2* (*SIERF.B.2*, *Solyc02g077360*), *SIERF.C.5* (*Solyc02g077370*), *SIERF13*  
356 (*Solyc01g090340*) and *SIERF17* (*Solyc12g009240*) were also significantly upregulated after  
357 EST induction of the NOR transcription factor (**Figure 6A**), suggesting them to be  
358 downstream targets of NOR.

359 As the phytohormone auxin is involved in controlling leaf senescence and fruit ripening (Kim  
360 *et al.*, 2011; Breitel *et al.*, 2016), we also included three auxin-related genes in our analysis,  
361 namely *SIGH3\_4* (*Solyc02g092820*), which encodes a putative indole-3-acetic acid amido  
362 synthetase, an enzyme conjugating auxin to an inactive form thereby reducing cellular free  
363 auxin levels, and small auxin up-regulated RNA67 (*SISAUR67*; *Solyc08g079140*). Expression  
364 of various *GH3* genes has previously been shown to increase in leaves during developmental  
365 and dark-induced senescence, consistent with the decrease of free auxin levels in senescing  
366 leaves (Buchanan-Wollaston *et al.*, 2005; van der Graaf *et al.*, 2006; Kim *et al.*, 2011). While  
367 *SIGH3\_4* was significantly upregulated upon induction of *NOR*, *SISAUR67* was not affected.  
368 Expression of *SISAUR74* (*Solyc10g052550*) was significantly reduced after *NOR* induction  
369 (**Figure 6A**).

370 We next analyzed expression of the selected genes by qRT-PCR in *ami-NOR* lines. Almost all  
371 genes that were upregulated in *NOR-IOE* plants after EST induction were downregulated in  
372 *ami-NOR* confirming the transcription activation role of NOR toward these genes (**Figure**  
373 **6A**).

374 Finally, we employed ChIP-qPCR to test binding of NOR to the promoters of selected  
375 downstream targets *in vivo*, including *SLABCG40*, *SIERT1B*, *SIKFB20* and *SIYLS4*. As shown  
376 in **Figure 6B**, NOR binds to all four promoters.

377

### 378 **SINAP2 affects *NOR* expression**

379 We previously reported that SINAP2, a tomato NAC transcription factor, functions as a  
380 positive regulator of leaf senescence by directly controlling the expression of various  
381 senescence-associated genes as direct targets. In addition, SINAP2 controls the expression of  
382 several ABA-related genes (Ma *et al.*, 2018). SINAP2 has two related DNA-binding sites,  
383 called BS1 and BS2, which are present in the promoters of its direct gene targets (Ma *et al.*,  
384 2018). As previous work on Arabidopsis indicated regulatory connectivity between different  
385 NAC TFs to control senescence (e.g. Garapati *et al.*, 2015; Kim *et al.*, 2018), we here thought  
386 to investigate the possibility that *NOR* is a downstream affected gene target of SINAP2. In  
387 accordance with this model, sequence analysis of the *NOR* promoter identified an SINAP2  
388 BS1 binding site 403 bp upstream of the ATG start codon (**Figure 7A**). Furthermore,  
389 expression of *NOR* significantly increased in transgenic tomato plants expressing *SINAP2*  
390 from an EST-inducible promoter (*SINAP2-IOE*; Ma *et al.*, 2018) 6 h after EST treatment  
391 (**Figure 7B**). Finally, SINAP2 directly binds to the *NOR* promoter, as shown by ChIP-qPCR  
392 (**Figure 7C**). Collectively, our data thus show that SINAP2 functions an upstream regulator of  
393 *NOR*.

394

### 395 **Discussion**

396 NOR-RIPENING (*NOR*) is a NAC transcription factor well characterized for its role in fruit  
397 ripening in tomato (Barry and Giovannoni, 2007; Casals *et al.*, 2012; Kumar *et al.*, 2018).  
398 Also in melon (*Cucumis melo*) a *NOR* homologue has been shown to affect fruit ripening  
399 (Rios *et al.*, 2017). Recently, several other NAC TFs have been reported to control fruit  
400 ripening in tomato, including e.g. SINAC4 (Zhu *et al.*, 2014), SINAC19 and SINAC48 (Kou  
401 *et al.*, 2016), while SINAC3 has a function in seed development (Han *et al.*, 2012; Han *et al.*,  
402 2014). With the data available so far, it appears that NAC TFs – in conjunction with other TFs  
403 of other families - form interconnected regulatory networks to control fruit aging. For

404 example, RIN, a long-known regulator of tomato fruit ripening of the MADS-box TF family,  
405 directly regulates *NOR* by binding to its promoter, as revealed by ChIP assay (Martel *et al.*,  
406 2011; Fujisawa *et al.*, 2013). In addition, expression of *NOR* and *RIN* is reduced in *SINAC4*  
407 RNA interference lines which might indicate that it acts as an upstream regulator of *NOR* and  
408 *RIN* (Zhu *et al.*, 2014). Furthermore, yeast two-hybrid assays revealed an interaction of  
409 *SINAC4* protein with *NOR* and *RIN*, although a functional relevance of this interaction *in*  
410 *planta* was not demonstrated (Zhu *et al.*, 2014). Recently, experimental evidence showed that  
411 the basic leucine zipper (bZIP) transcription factor *SIAREB1*, which at the transcript level is  
412 induced by ABA, may function as an upstream regulator of *NOR*, although direct *in planta*  
413 binding of *SIAREB1* to the *NOR* promoter by e.g. chromatin-immunoprecipitation (ChIP)  
414 was not demonstrated (Mou *et al.*, 2018).

415 Although increasing evidence suggests an involvement of multiple NAC factors in tomato  
416 fruit development, a role of NACs in the regulation of leaf senescence in this vegetable crop  
417 has rarely been demonstrated despite the fact that NACs play diverse functions in the control  
418 of leaf senescence in other species (Podzimska-Sroka *et al.*, 2015; Leng *et al.*, 2017; Ma *et*  
419 *al.*, 2018; Yang and Udvardi, 2018). A particular detailed knowledge about the NAC-  
420 controlled senescence networks is available for Arabidopsis where multiple NAC TFs have  
421 been shown to positively or negatively regulate leaf senescence by binding to the promoters  
422 of diverse target genes to control different physiological processes underlying the complex  
423 syndrome of senescence (Guo and Gan, 2006; Kim *et al.*, 2009; Wu *et al.*, 2012; Garapati *et*  
424 *al.*, 2015; Sakuraba *et al.*, 2016; Oda-Yamamizo *et al.*, 2016; Kamranfar *et al.*, 2018; Kim *et*  
425 *al.*, 2018; Li *et al.*, 2018).

426 The situation is less clear in tomato, although aging in fruits and leaves may at least in part  
427 share identical TFs and gene regulatory networks. Recently, Lira *et al.* (2017) found that  
428 orthologs of *ORE1*, a central positive regulator of leaf senescence in Arabidopsis (Kim *et al.*,  
429 2009; Balazadeh *et al.*, 2010), control leaf senescence in tomato leading to extended  
430 greenness upon downregulation of *SIORE1* gene expression. The increased fruit yield in such  
431 plants might be due to an extended photosynthetic lifetime of the leaves, providing carbon for  
432 fruit (sink) growth over a longer period than in wild-type plants, although another possibility  
433 is that *SIORE1* genes directly control ripening processes in fruits. Similarly, downregulation  
434 of NAC transcription factor *SINAP2* expression delays leaf senescence in tomato followed by  
435 an increased fruit yield (Ma *et al.*, 2018). *SINAP2* binds to the promoters of several  
436 senescence-related genes, including *SISAG113* (*Solanum lycopersicum* *SENESCENCE-*  
437 *ASSOCIATED GENE113*) and the chlorophyll-degradation genes *SISGR1* (*S. lycopersicum*

438 *senescence-inducible chloroplast stay-green protein 1*) and *SIPAO* (*S. lycopersicum*  
439 *pheide a oxygenase*). *SINAP2* also directly controls the expression of several abscisic acid  
440 (ABA)-related genes including ABA transport, biosynthesis and degradation genes,  
441 suggesting that it has an important function in controlling ABA homeostasis in senescing  
442 tomato leaves (Ma *et al.*, 2018).

443 Here, we report that the long-known tomato fruit ripening factor *NOR* controls leaf  
444 senescence, thereby identifying a novel role of *NOR* for controlling development. Of note,  
445 overexpression of *NOR* in both, transgenic tomato and Arabidopsis plants promotes  
446 developmental leaf senescence as well as dark-induced senescence. The role of *NOR* in  
447 regulating leaf senescence is related to changes in the expression of senescence-associated  
448 genes (SAGs) and chlorophyll degradation genes (CDGs). Expression of various senescence-  
449 related genes was enhanced in constitutive or estradiol-inducible *NOR* overexpressors, and we  
450 demonstrated binding of the *NOR* TF to their promoters by chromatin-immunoprecipitation  
451 (ChIP). As direct *in vivo* targets of *NOR* we identified *SISAG15*, *SISAG113*, *SISGR1* and  
452 *SIPPH*, as well *SLABCG40*, *SIERT1B*, *SIKFB20* and *SIYLS4*. Of note, *SISAG113*, *SISGR1*, and  
453 *SLABCG40* were previously also identified as direct targets of *SINAP2* (Ma *et al.*, 2018),  
454 strongly suggesting functional overlap of *NOR* and *SINAP2* in regulating leaf senescence-  
455 associated genes in tomato. In accordance with this, both TFs belong to the same clade (the  
456 *NAP* clade) of *NAC* factors (Kou *et al.*, 2014). This clade also includes the *AtNAP* gene, a  
457 well-known regulator of leaf senescence in *A. thaliana* (Guo and Gan, 2006). Interestingly,  
458 however, *SIPAO* did not appear to be a direct downstream target gene of *NOR* (this report;  
459 **Figure 5B**), while we previously found it to be a direct target of *SINAP2* (Ma *et al.*, 2018),  
460 indicating partial, but not complete, functional redundancy of both TFs with respect to the  
461 control of leaf senescence. Such a redundancy of *NAC* TFs for the control of senescence was  
462 recently highlighted for Arabidopsis by Li *et al.* (2018).

463 Another important finding of our study is that *SINAP2* itself is affected, at the expression  
464 level, by *NOR*; more specifically, as shown in **Figure 3D**, expression of *SINAP2* is  
465 significantly reduced in leaves of the *nor* mutant, while it is elevated in the *NOR*  
466 overexpressor line *OX-19*, suggesting that *NOR* acts upstream of *SINAP2*. On the other hand,  
467 we found that expression of *NOR* is enhanced in *SINAP2-IOE* plants shortly (6 h) after EST  
468 treatment (**Figure 7B**), consistent with a model that places *SINAP2* upstream of *NOR*.  
469 Collectively, the available experimental data therefore suggest that *NOR* and *SINAP2*  
470 together form a positively acting regulatory loop whereby the expressional activity of each  
471 *NAC* gene is enhanced by the respective other *NAC* transcription factor. However, we note

472 that unravelling the details of this regulatory interaction require further detailed investigation  
473 in the future.

474 Together, the available data strongly suggest that NAC transcription factors controlling leaf  
475 senescence also affect age-dependent senescence (or ripening) of fleshy and non-fleshy fruits,  
476 across species. This observation raises a number of interesting questions, including the  
477 following: (i) How do NAC TFs exert their specific aging-related functions in photosynthetic  
478 leaves compared to those in fruits, i.e., how are the target genes prevalent or specific for leaf  
479 senescence selected compared to target genes involved in fruit ripening? (ii) Related to this:  
480 do NAC TFs interact with different other transcription factors in leaves *versus* fruits to exert  
481 their molecular functions? (iii) To what extent do epigenetic marks affect which genes are  
482 primary targets of the senescence-related NACs in leaves *versus* fruits? (iv) In which way has  
483 evolution shaped the gene regulatory landscape of age-related NAC TFs in leaves compared  
484 to fruits? These questions lead to an even wider perspective which addresses the  
485 diversification of NAC functions at the organ, tissue and cellular levels, an aspect not well  
486 understood at present. Future research clearly has to address this aspect in more detail.

487

#### 488 **Acknowledgments**

489 We thank Dr. Karin Koehl and her team (Max Planck Institute of Molecular Plant Physiology)  
490 for plant care, and Gang-Ping Xue (CSIRO Agriculture and Food, Australia) for performing the  
491 binding site selection assays. We thank the University of Potsdam and the Max Planck Institute  
492 of Molecular Plant Physiology for supporting our research.

493

#### 494 **References**

495

496 **Alseekh S, Tohge T, Wendenberg R, Scossa F, Omranian N, Li J, Kleessen S, Giavalisco**  
497 **P, Pleban T, Mueller-Roeber B, Zamir D, Nikoloski Z, Fernie AR.** 2015.  
498 Identification and mode of inheritance of quantitative trait loci for secondary  
499 metabolite abundance in tomato. *The Plant Cell* **27**, 485-512.

500 **Arnon DI.** 1949. Copper enzymes in isolated chloroplasts - Polyphenoloxidase in *Beta*  
501 *vulgaris*. *Plant Physiology* **24**, 1-15.

502 **Arvidsson S, Kwasniewski M, Riano-Pachon DM, Mueller-Roeber B.** 2008. QuantPrime -  
503 a flexible tool for reliable high-throughput primer design for quantitative PCR. *BMC*  
504 *Bioinformatics* **9**: 465.

505 **Balazadeh S, Riano-Pachon DM, Mueller-Roeber B.** 2008. Transcription factors regulating  
506 leaf senescence in *Arabidopsis thaliana*. *Plant Biology* **10**, 63-75.

507 **Balazadeh S, Siddiqui H, Allu AD, Matallana-Ramirez LP, Caldana C, Mehrnia M,**  
508 **Zanor MI, Kohler B, Mueller-Roeber B.** 2010. A gene regulatory network  
509 controlled by the NAC transcription factor ANAC092/AtNAC2/ORE1 during salt-  
510 promoted senescence. *The Plant Journal* **62**, 250-264.

- 511 **Balazadeh S, Schildhauer J, Araujo WL, Munne-Bosch S, Fernie AR, Proost S,**  
512 **Humbeck K, Mueller-Roeber B.** 2014. Reversal of senescence by N resupply to N-  
513 starved *Arabidopsis thaliana*: transcriptomic and metabolomic consequences. *Journal*  
514 *of Experimental Botany* **65**, 3975-3992.
- 515 **Barry CS, Giovannoni JJ.** 2007. Ethylene and fruit ripening. *Journal of Plant Growth*  
516 *Regulation* **26**, 143-159.
- 517 **Biswal UC, Mohanty P.** 1976. Dark stress-induced senescence of detached barley leaf. II.  
518 Alteration in absorption characteristic and photochemical activity of chloroplasts  
519 isolated from senescing leaves. *Plant Science Letters* **7**, 371-379.
- 520 **Breitel DA, Chappell-Maor L, Meir S, Panizel I, Puig CP, Hao Y, Yifhar T, Yasuor H,**  
521 **Zouine M, Bouzayen M, Granell Richart A, Rogachev I, Aharoni A.** 2016.  
522 AUXIN RESPONSE FACTOR 2 intersects hormonal signals in the regulation of  
523 tomato fruit ripening. *PLoS Genetics* **12**, e1005903.
- 524 **Buchanan-Wollaston V, Page T, Harrison E, et al.** 2005. Comparative transcriptome  
525 analysis reveals significant differences in gene expression and signaling pathways  
526 between developmental and dark/starvation-induced senescence in *Arabidopsis*. *The*  
527 *Plant Journal* **42**, 567-585.
- 528 **Carrasco-Orellana C, Stappung Y, Mendez-Yañez A, Allan AC, Espley RV, Plunkett**  
529 **BJ, Moya-Leon MA, Herrera R.** 2018. Characterization of a ripening-related  
530 transcription factor FcNAC1 from *Fragaria chiloensis* fruit. *Science Reports* **8**, 10524.  
531 doi: 10.1038/s41598-018-28226-y.
- 532 **Casals J, Pascual L, Canizares J, Cebolla-Cornejo J, Casanas F, Nuez F.** 2012. Genetic  
533 basis of long shelf life and variability into Penjar tomato. *Genetic Resources and Crop*  
534 *Evolution* **59**, 219-229.
- 535 **Catalá C, Rose JK, Bennett AB.** 2000. Auxin-regulated genes encoding cell wall-modifying  
536 proteins are expressed during early tomato fruit growth. *Plant Physiology* **122**: 527-  
537 534.
- 538 **Chen CT, Kao CH.** 1991. Senescence of rice leaves XXX. Levels of endogenous polyamines  
539 and dark-induced senescence of rice leaves. *Plant and Cell Physiology* **32**, 935-941.
- 540 **Fan K, Bibi N, Gan SS, Li F, Yuan SN, Ni M, Wang M, Shen H, Wang XD.** 2015. A  
541 novel NAP member GhNAP is involved in leaf senescence in *Gossypium hirsutum*.  
542 *Journal of Experimental Botany* **66**, 4669-4682.
- 543 **Fujisawa M, Nakano T, Shima Y, Ito Y.** 2013. A large-scale identification of direct targets  
544 of the tomato MADS box transcription factor RIPENING INHIBITOR reveals the  
545 regulation of fruit ripening. *The Plant Cell* **25**, 371-386.
- 546 **Garapati P, Xue GP, Munne-Bosch S, Balazadeh S.** 2015. Transcription factor ATAF1 in  
547 *Arabidopsis* promotes senescence by direct regulation of key chloroplast maintenance  
548 and senescence transcriptional cascades. *Plant Physiology* **168**, 1122-1139.
- 549 **Giovannoni JJ.** 2007. Fruit ripening mutants yield insights into ripening control. *Current*  
550 *Opinion in Plant Biology* **10**: 283-289.
- 551 **Giovannoni JJ, Tanksley SD, Vrebalov J, Noensie E.** 2004. *NOR* gene for use in  
552 manipulation of fruit quality and ethylene response. US Patent No. 5,234,834 issued  
553 13 July 2004.
- 554 **Guo Y, Gan S-S.** 2006. AtNAP, a NAC family transcription factor, has an important role in  
555 leaf senescence. *The Plant Journal* **46**, 601-612.
- 556 **Han Q, Zhang J, Li H, Luo Z, Ziaf K, Ouyang B, Wang T, Ye Z.** 2012. Identification and  
557 expression pattern of one stress-responsive NAC gene from *Solanum lycopersicum*.  
558 *Molecular Biology Reporter* **39**, 1713-1720.
- 559 **Han QQ, Song YZ, Zhang JY, Liu LF.** 2014. Studies on the role of the *SINAC3* gene in  
560 regulating seed development in tomato (*Solanum lycopersicum*). *The Journal of*  
561 *Horticultural Science and Biotechnology* **89**, 423-429.



- 562 **Hendelman A, Stav R, Zemach H, Arazi T.** 2013. The tomato NAC transcription factor  
563 SINAM2 is involved in flower-boundary morphogenesis. *Journal of Experimental*  
564 *Botany* **64**, 5497-5507.
- 565 **Hwang I, Sheen J, Müller B.** 2014. Cytokinin signaling networks. *Annual Reviews of Plant*  
566 *Biology* **63**, 353-380.
- 567 **Itkin M, Heinig U, Tzfadia O, Bhide AJ, Shinde B, Cardenas PD, Bocobza SE, Unger T,**  
568 **Malitsky S, Finkers R, Tikunov Y, Bovy A, Chikate Y, Singh P, Rogachev I,**  
569 **Beekwilder J, Giri AP, Aharoni A.** 2013. Biosynthesis of antinutritional alkaloids in  
570 solanaceous crops is mediated by clustered genes. *Science* **341**, 175-179.
- 571 **Kamranfar I, Xue GP, Tohge T, Sedaghatmehr M, Fernie AR, Balazadeh S, Mueller-**  
572 **Roeber B.** 2018. Transcription factor RD26 is a key regulator of metabolic  
573 reprogramming during dark-induced senescence. *New Phytologist* **218**, 1543-1557.
- 574 **Kang J, Hwang JU, Lee M, Kim YY, Assmann SM, Martinoia E, Lee Y.** 2010. PDR-type  
575 ABC transporter mediates cellular uptake of the phytohormone abscisic acid.  
576 *Proceedings of the National Academy of Sciences USA* **107**, 2355-2360.
- 577 **Karimi M, Inzé D, Depicker A.** 2002. GATEWAY vectors for *Agrobacterium*-mediated  
578 plant transformation. *Trends in Plant Science* **7**, 193-195.
- 579 **Kaufmann K, Muiño JM, Østerås M, Farinelli L, Krajewski P, Angenent GC.** 2010.  
580 Chromatin immunoprecipitation (ChIP) of plant transcription factors followed by  
581 sequencing (ChIP-SEQ) or hybridization to whole genome arrays (ChIP-CHIP).  
582 *Nature Protocols* **5**, 457-472.
- 583 **Kim HJ, Chiang YH, Kieber JJ, Schaller GE.** 2013a. SCFKMD controls cytokinin  
584 signaling by regulating the degradation of type-B response regulators. *Proceedings of*  
585 *the National Academy of Sciences USA* **110**: 10028-10033.
- 586 **Kim HJ, Kieber JJ, Schaller GE.** 2013b. The rice F-box protein KISS ME DEADLY2  
587 functions as a negative regulator of cytokinin signalling. *Plant Signalling and*  
588 *Behavior* **8**, e26434.
- 589 **Kim HJ, Park JH, Kim J, Kim JJ, Hong S, Kim J, Kim JH, Woo HR, Hyeon C, Lim PO,**  
590 **Nam HG, Hwang D.** 2018. Time-evolving genetic networks reveal a NAC troika that  
591 negatively regulates leaf senescence in *Arabidopsis*. *Proceedings of the National*  
592 *Academy of Sciences USA* **115**, E4930-E4939.
- 593 **Kim JI, Murphy AS, Baek D, Lee SW, Yun DJ, Bressan RA, Narasimhan ML.** 2011.  
594 *YUCCA6* over-expression demonstrates auxin function in delaying leaf senescence in  
595 *Arabidopsis thaliana*. *Journal of Experimental Botany* **62**, 3981-3992.
- 596 **Kim JH, Woo HR, Kim J, Lim PO, Lee IC, Choi SH, Hwang D, Nam HG.** 2009.  
597 Trifurcate feed-forward regulation of age-dependent cell death involving *miR164* in  
598 *Arabidopsis*. *Science* **323**, 1053-1057.
- 599 **Kou X, Liu C, Han L, Wang S, Xue Z.** 2016. NAC transcription factors play an important  
600 role in ethylene biosynthesis, reception and signaling of tomato fruit ripening.  
601 *Molecular Genetics and Genomics* **291**, 1205-1217.
- 602 **Kou X, Wang S, Wu M, , Guo R, Xue Z, Meng N, Tao X, Chen M, Zhang Y.** 2014.  
603 Molecular characterization and expression analysis of NAC family transcription  
604 factors in tomato. *Plant Molecular Biology Reporter* **32**, 501. 501-516
- 605 **Kou X, Watkins CB, Gan SS.** 2012. *Arabidopsis* AtNAP regulates fruit senescence. *Journal*  
606 *of Experimental Botany* **63**, 6139-6147.
- 607 **Kumar R, Tamboli V, Sharma R, Sreelakshmi Y.** 2018. *NAC-NOR* mutations in tomato  
608 Penjar accessions attenuate multiple metabolic processes and prolong the fruit shelf  
609 life. *Food Chemistry* **259**, 234-244.
- 610 **Kunieda T, Mitsuda N, Ohme-Takagi M, Takeda S, Aida M, Tasaka M, Kondo M,**  
611 **Nishimura M, Hara-Nishimura I.** 2008. NAC family proteins NARS1/NAC2 and

- 612 NARS2/NAM in the outer integument regulate embryogenesis in Arabidopsis. The  
613 Plant Cell **20**, 2631-2642.
- 614 **Leng Y, Ye G, Zeng D.** 2017. Genetic dissection of leaf senescence in rice. International  
615 Journal of Molecular Sciences **18**, doi: 10.3390/ijms18122686.
- 616 **Li Z, Woo HR, Guo H.** 2018. Genetic redundancy of senescence-associated transcription  
617 factors in Arabidopsis. Journal of Experimental Botany **69**, 811-823.
- 618 **Liang CZ, Wang YQ, Zhu YN, Tang JY, Hu B, Liu LC, Ou SJ, Wu HK, Sun XH, Chu  
619 JF, Chu CC.** 2014. OsNAP connects abscisic acid and leaf senescence by fine-tuning  
620 abscisic acid biosynthesis and directly targeting senescence-associated genes in rice.  
621 Proceedings of the National Academy of Sciences USA **111**, 10013-10018.
- 622 **Lira BS, Gramegna G, Trench BA, Alves FRR, Silva EM, Silva GFF, Thirumalaikumar  
623 VP, Lupi ACD, Demarco D, Purgatto E, Nogueira FTS, Balazadeh S, Freschi L,  
624 Rossi M.** 2017. Manipulation of a senescence-associated gene improves fleshy fruit  
625 yield. Plant Physiology **175**, 77-91.
- 626 **Ma X, Zhang Y, Turečková V, Xue GP, Fernie AR, Mueller-Roeber B, Balazadeh S.**  
627 2018. The NAC transcription factor SINAP2 regulates leaf senescence and fruit yield  
628 in tomato. Plant Physiology **177**, 1286-1302.
- 629 **Mao CJ, Lu SC, Lv B, Zhang B, Shen JB, He JM, Luo LQ, Xi DD, Chen X, Ming F.**  
630 2017. A rice NAC transcription factor promotes leaf senescence via ABA  
631 biosynthesis. Plant Physiology **174**, 1747-1763.
- 632 **Martel C, Vrebalov J, Tafelmeyer P, Giovannoni JJ.** 2011. The tomato MADS-box  
633 transcription factor RIPENING INHIBITOR interacts with promoters involved in  
634 numerous ripening processes in a COLORLESS NONRIPENING-dependent manner.  
635 Plant Physiology **157**, 1568-1579.
- 636 **Mou W, Li D, Luo Z, Li L, Mao I, Ying T.** (2018) SIAREB1 transcriptional activation of  
637 *NOR* is involved in abscisic acid-modulated ethylene biosynthesis during tomato fruit  
638 ripening. Plant Science, in press. doi.org/10.1016/j.plantsci.2018.07.015
- 639 **Moyano E, Martínez-Rivas FJ, Blanco-Portales R, Molina-Hidalgo FJ, Ric-Varas P,  
640 Matas-Arroyo AJ, Caballero JL, Muñoz-Blanco J, Rodríguez-Franco A.** 2018.  
641 Genome-wide analysis of the NAC transcription factor family and their expression  
642 during the development and ripening of the *Fragaria × ananassa* fruits. PLoS One **13**:  
643 e0196953. doi: 10.1371/journal.pone.0196953.
- 644 **Nguyen N, Suokas M, Karppinen K, Vuosku J, Jaakola L, Häggman H.** 2018.  
645 Recognition of candidate transcription factors related to bilberry fruit ripening by de  
646 novo transcriptome and qRT-PCR analyses. Science Reports **8**, 9943.
- 647 **Noh Y-S, Amasino RM.** 1999. Identification of a promoter region responsible for the  
648 senescence-specific expression of *SAG12*. Plant Molecular Biology **41**, 181-194.
- 649 **Oda-Yamamizo C, Mitsuda N, Sakamoto S, Ogawa D, Ohme-Takagi M, Ohmiya A.**  
650 2016. The NAC transcription factor ANAC046 is a positive regulator of chlorophyll  
651 degradation and senescence in Arabidopsis leaves. Science Reports **6**, 23609.
- 652 **Oeller PW, Lu MW, Taylor LP, Pike DA, Theologis A.** 1991. Reversible inhibition of  
653 tomato fruit senescence by antisense RNA. Science **254**, 437-439.
- 654 **Podzimska-Sroka D, O'Shea C, Gregersen PL, Skriver K.** 2015. NAC transcription factors  
655 in senescence: from molecular structure to function in crops. Plants (Basel) **4**, 412-  
656 448.
- 657 **Pourtau N, Jennings R, Pelzer E, Pallas J, Wingler A.** 2006. Effect of sugar-induced  
658 senescence on gene expression and implications for the regulation of senescence in  
659 Arabidopsis. Planta **224**, 556-568.
- 660 **Proost S, Van Bel M, Vaneechoutte D, Van de Peer Y, Inzé D, Mueller-Roeber B,  
661 Vandepoele K.** 2015. PLAZA 3.0: an access point for plant comparative genomics.  
662 Nucleic Acids Research **43**, D974-D981.

- 663 **Puranik S, Sahu PP, Srivastava PS, Prasad M.** 2012. NAC proteins: regulation and role in  
664 stress tolerance. *Trends in Plant Science* **17**, 369-381.
- 665 **Qin GZ, Wang YY, Cao BH, Wang WH, Tian SP.** 2012. Unraveling the regulatory  
666 network of the MADS box transcription factor RIN in fruit ripening. *The Plant Journal*  
667 **70**, 243-255.
- 668 **Ríos P, Argyris J, Vegas J, Leida C, Kenigswald M, Tzuri G, Troadec C, Bendahmane**  
669 **A, Katzir N, Picó B, Monforte AJ, Garcia-Mas J.** 2017. ETHQV6.3 is involved in  
670 melon climacteric fruit ripening and is encoded by a NAC domain transcription factor.  
671 *The Plant Journal* **91**, 671-683.
- 672 **Sakuraba Y, Han SH, Lee SH, Hörtensteiner S, Paek NC.** 2016. Arabidopsis NAC016  
673 promotes chlorophyll breakdown by directly upregulating STAYGREEN1  
674 transcription. *Plant Cell Reports* **35**, 155-166.
- 675 **Shao H, Wang H, Tang X.** 2015. NAC transcription factors in plant multiple abiotic stress  
676 responses: progress and prospects. *Frontiers in Plant Science* **6**, 902.
- 677 **Speirs J, Lee E, Holt K, Yong-Duk K, Scott NS, Loveys B, Schuch W.** 1998. Genetic  
678 manipulation of alcohol dehydrogenase levels in ripening tomato fruit affects the  
679 balance of some flavor aldehydes and alcohols. *Plant Physiology* **117**, 1047-1058.
- 680 **Thirumalaikumar VP, Devkar V, Mehterov N, Ali S, Ozgur R, Turkan I, Mueller-**  
681 **Roeber B, Balazadeh S.** 2018. NAC transcription factor JUNGBRUNNEN1  
682 enhances drought tolerance in tomato. *Plant Biotechnology Journal* **16**, 354-366.
- 683 **Tomato Genome Consortium.** 2012. The tomato genome sequence provides insights into  
684 fleshy fruit evolution. *Nature* **485**, 635-641.
- 685 **Uauy C, Distelfeld A, Fahima T, Blechl A, Dubcovsky J.** 2006. A NAC gene regulating  
686 senescence improves grain protein, zinc, and iron content in wheat. *Science* **314**,  
687 1298-1301.
- 688 **van der Graaff E, Schwacke R, Schneider A, Desimone M, Flügge U, Kunze R.** 2006.  
689 Transcription analysis of Arabidopsis membrane transporters and hormone pathways  
690 during developmental and induced leaf senescence. *Plant Physiology* **141**, 776-792.
- 691 **Weaver LM, Amasino RM.** 2001. Senescence is induced in individually darkened  
692 Arabidopsis leaves but inhibited in whole darkened plants. *Plant Physiology* **127**, 876-  
693 886.
- 694 **Woo HR, Kim JH, Nam HG, Lim PO.** 2004. The delayed leaf senescence mutants of  
695 Arabidopsis, *ore1*, *ore3*, and *ore9* are tolerant to oxidative stress. *Plant and Cell*  
696 *Physiology* **45**, 923-932.
- 697 **Wu A, Allu AD, Garapati P, Siddiqui H, Dortay H, Zanor MI, Asensi-Fabado MA,**  
698 **Munne-Bosch S, Antonio C, Tohge T, Fernie AR, Kaufmann K, Xue GP,**  
699 **Mueller-Roeber B, Balazadeh S.** 2012. JUNGBRUNNEN1, a reactive oxygen  
700 species-responsive NAC transcription factor, regulates longevity in Arabidopsis. *The*  
701 *Plant Cell* **24**, 482-506.
- 702 **Xue GP.** 2002. Characterisation of the DNA-binding profile of barley HvCBF1 using an  
703 enzymatic method for rapid, quantitative and high-throughput analysis of the DNA-  
704 binding activity. *Nucleic Acids Research* **30**, e77.
- 705 **Xue GP.** 2005. A CELD-fusion method for rapid determination of the DNA-binding  
706 sequence specificity of novel plant DNA-binding proteins. *The Plant Journal* **41**, 638-  
707 649.
- 708 **Xue GP, Bower NI, McIntyre CL, Riding GA, Kazan K, Shorter R.** 2006. TaNAC69 from  
709 the NAC superfamily of transcription factors is up-regulated by abiotic stresses in  
710 wheat and recognises two consensus DNA-binding sequences. *Functional Plant*  
711 *Biology* **33**, 43-57.
- 712 **Yang J, Udvardi M.** 2018. Senescence and nitrogen use efficiency in perennial grasses for  
713 forage and biofuel production. *Journal of Experimental Botany* **69**, 855-865.

- 714 **Yoshida S, Ito M, Nishida I, Watanabe A.** 2001. Isolation and RNA gel blot analysis of  
715 genes that could serve as potential molecular markers for leaf senescence in  
716 *Arabidopsis thaliana*. *Plant and Cell Physiology* **42**, 170-178.
- 717 **Zhang K, Xia X, Zhang Y, Gan SS.** 2012. An ABA-regulated and Golgi-localized protein  
718 phosphatase controls water loss during leaf senescence in *Arabidopsis*. *The Plant*  
719 *Journal* **69**, 667-678.
- 720 **Zhao D, Derkx AP, Liu DC, Buchner P, Hawkesford MJ.** 2015. Overexpression of a NAC  
721 transcription factor delays leaf senescence and increases grain nitrogen concentration  
722 in wheat. *Plant Biology* **17**, 904-913.
- 723 **Zhao Y, Gao J, Im Kim J, Chen K, Bressan RA, Zhu JK.** 2017. Control of plant water use  
724 by ABA induction of senescence and dormancy: an overlooked lesson from evolution.  
725 *Plant and Cell Physiology* **58**, 1319-1327.
- 726 **Zhong J, Powell S, Preston JC.** 2016. Organ boundary NAC-domain transcription factors  
727 are implicated in the evolution of petal fusion. *Plant Biology (Stuttg)* **18**, 893-902.
- 728 **Zhou Y, Huang WF, Liu L, Chen TY, Zhou F, Lin YJ.** 2013. Identification and functional  
729 characterization of a rice NAC gene involved in the regulation of leaf senescence.  
730 *BMC Plant Biology* **13**.
- 731 **Zhu M, Chen G, Zhou S, Tu Y, Wang Y, Dong T, Hu Z.** 2014. A new tomato NAC  
732 (NAM/ATAF1/2/CUC2) transcription factor, SINAC4, functions as a positive  
733 regulator of fruit ripening and carotenoid accumulation. *Plant and Cell Physiology* **55**,  
734 119-135.
- 735 **Zuo J, Niu QW, Frugis G, Chua NH.** 2002. The *WUSCHEL* gene promotes vegetative-to-  
736 embryonic transition in *Arabidopsis*. *The Plant Journal* **30**: 349-359.

737 **Figure legends**

738

739 **Figure 1. Subcellular localization of NOR and NOR expression during senescence.**

740 **(A)** Schematic presentation of the NAM domain of NOR. Numbers indicate amino acid  
741 positions. **(B)** Phylogenetic analysis of selected NAC proteins. The phylogenetic tree was  
742 constructed by MEGA 5.05 software using the neighbor-joining method with the following  
743 parameters: bootstrap analysis of 1,000 replicates, Poisson model, and pairwise deletion.  
744 NOR and SINAC3 are two tomato TFs and the others are from Arabidopsis. Gene codes of  
745 the Arabidopsis TFs are: *ATAF1*, *At1g01720*; *ATAF2*, *At5g08790*; *NARS1*, *At3g15510*;  
746 *NARS2*, *At1g52880*; *CUC1*, *At3g15170*; *CUC2*, *At5g53950*. **(C)** Subcellular localization of  
747 NOR protein. NOR fused to GFP was visualized in epidermal cells of transgenic tomato  
748 plants by confocal laser scan microscopy. Scale bar, 10  $\mu$ m. **(D)** *NOR* transcript level in the 3<sup>rd</sup>  
749 true leaf at different developmental stages of tomato wild-type cv. Moneymaker plants. The  
750 age of the plants was 6 – 14 weeks (6W - 14W). The y-axis indicates expression level (40-  
751 dCt). Data are means  $\pm$  SD of three biological replicates. **(E)** Expression of *NOR* in young  
752 detached leaves of 8-week-old WT plants before (day 0) and after 14 days of dark treatment.  
753 Leaves were excised from the top part of the stem. Data are means  $\pm$  SD (n = 3). Asterisks  
754 denote significant difference from Day 0 (Student's *t*-test, \*\*:  $P \leq 0.01$ ).

755

756 **Figure 2. NOR promotes leaf senescence in tomato.**

757 **(A)** Phenotype of 12-week-old WT, *OX-L5*, *OX-L19*, and *nor* plants. Note the early leaf  
758 senescence in *NOR* overexpressors. **(B)** Yellow leaf ratio of 12-week-old WT, *OX-L5*, *OX-*  
759 *L19*, and *nor* plants. Yellow leaves showing more than 50% yellowing were counted and  
760 divided by the total number of leaves. Data are means  $\pm$  SD (n = 5). **(C)** Chlorophyll loss of  
761 the 3<sup>rd</sup> true leaf (counted from the bottom of the stem) of 8-week- (8W), 10-week- (10W), 12-  
762 week- (12W) and 14-week-old (14W) WT, *OX-L5*, *OX-L19*, and *nor* plants. Chlorophyll  
763 content was measured by a SPAD meter and at each time point compared to 8W for each  
764 genotype (set to 1). Data are means  $\pm$  SD of three biological replicates. Asterisks in (B) and  
765 (C) indicate significant differences from WT (Student's *t*-test, \*:  $P \leq 0.05$ ; \*\*:  $P \leq 0.01$ ).

766

767 **Figure 3. Dark-induced leaf senescence in NOR-modified plants.**

768 **(A)** Detached leaves of 8-week-old *nor*, WT, and *OX-L19* plants after dark treatment. Young  
769 leaves from the top of the stem were detached and subjected to darkness for 14 days (Dark).  
770 **(B)** Chlorophyll content of leaves before darkness (control) and of dark-treated leaves.

771 Chlorophyll content was measured using a SPAD meter. **(C)** Ion leakage of leaves before  
772 (control) and after dark treatment. **(D)** Heat map showing the fold change ( $\log_2$ ) of the  
773 expression of *SAGs* and chlorophyll degradation genes in detached leaves of 8-week-old  
774 plants *nor* and *OX-L19*, after dark treatment, compared to WT. The full data are given in  
775 **Table S2**. In ((B) and (C)), asterisks indicate significant differences from the WT (Student's *t*-  
776 test; \*\*:  $P \leq 0.01$ ).

777

#### 778 **Figure 4. Overexpressing *NOR* in *Arabidopsis* promotes leaf senescence.**

779 **(A)** Phenotype of *Arabidopsis* Col-0 wild-type and *NOR* overexpression plants. The upper  
780 panel shows *NOR* transcript abundance in *OX-L6* and *OX-L8* plants, determined by end-point  
781 PCR; as expected, no *NOR* transcript is observed in the *Arabidopsis* WT. The lower panel  
782 shows the phenotype of 5-week-old plants (Col-0 and *NOR* overexpressors). **(B)** Yellow leaf  
783 ratio of 5-week-old Col-0, *OX-L6*, and *OX-L8* plants. Yellow leaves showing more than 50%  
784 yellowing were counted and compared to the total leaf number. Data are means  $\pm$  SD ( $n = 5$ ).  
785 **(C)** Dark-induced senescence. DDI, days after dark incubation. Note the more pronounced  
786 senescence in the two *NOR* overexpressors compared to Col-0 at 6 DDI. Leaves no. 5 - 7  
787 were detached from the various plants were used in the experiment. **(D)** Chlorophyll content  
788 of (C), at 6 DDI of Col-0, *OX-L6*, and *OX-L8* plants ( $n = 5$ ). **(E)** Expression of *AtSAG12* in  
789 detached leaves no. 5 - 7 of Col-0, *OX-L6*, and *OX-L8* plants at 6 DDI. The y-axis indicates  
790 expression level (40-dCt). Data are means  $\pm$  SD of three biological replicates. Asterisks in  
791 (B), (D) and (E) indicate significant difference from the Col-0 wild type (Student's *t*-test; \*:  $P$   
792  $\leq 0.05$ ; \*\*:  $P \leq 0.01$ ).

793

#### 794 **Figure 5. Direct regulation of *SAGs* by *NOR*.**

795 **(A)** Schematic diagram showing positions of *NOR* binding sites in 1-kb promoters of selected  
796 genes. Arrows indicates the ATG translational start codon. Light-grey boxes indicate the  
797 *NOR* binding sites and black boxes indicate the coding regions of the genes. Sequences of the  
798 gene promoters including the *NOR* binding sites tested in the ChIP experiments are given in  
799 **Table S3**. **(B)** ChIP-qPCR shows enrichment of *SISAG15*, *SISAG113*, *SISGR1* and *SIPPH*  
800 promoter (1 kb) regions containing the *NOR* binding site. Eight-week-old *NOR-GFP* plants  
801 (mature leaves no. ~3–5) were harvested for the ChIP experiment. qPCR was performed to  
802 quantify the enrichment of the promoter regions. In the case of *SISAG113*, which has two  
803 potential *NOR* binding sites in its promoter (see panel A), we tested binding of *NOR* to the  
804 sequence proximal to the *ATG* start codon. Values were normalized to the values for

805 *Solyc04G009030* (promoter lacking a NOR binding site). Data are the means  $\pm$  SD of two  
806 independent biological replicates, each determined in three technical replicates.

807

808 **Figure 6. Heat map of differentially expressed genes in *NOR-IOE* and *ami-NOR* plants.**

809 **(A)** Gene expression was analyzed by qRT-PCR in *NOR-IOE* seedlings treated with EST (15  
810  $\mu$ M) for 6 h and compared to expression in mock-treated (ethanol, 0.15% [v/v]) seedlings (left  
811 column), or in *ami-NOR* seedlings compared to wild-type (WT) seedlings. Seedlings were  
812 three weeks old. The color code indicates the  $\log_2$  scale of the fold change; blue,  
813 downregulated; red, upregulated. Data represent means of three biological replicates. Data are  
814 means  $\pm$  SD of three biological replicates. Asterisks indicate significant difference from  
815 mock-treated samples (for *NOR-IOE* samples) or from WT (for *ami-NOR* samples). Student's  
816 *t*-test; \*:  $P \leq 0.05$ ; \*\*:  $P \leq 0.01$ ). The full data are given in **Table S2**. **(B)** ChIP-qPCR shows  
817 enrichment of *SLABCG40*, *SIERT1B*, *SIKFB20*, and *SIYLS4* promoter regions containing the  
818 NOR binding site within the 1-kb upstream promoter regions of the corresponding genes.  
819 Experimental conditions were as described in legend to **Figure 5B**. Sequences of the gene  
820 promoters including the NOR binding sites tested in the ChIP experiments are given in **Table**  
821 **S3**. Data are the means  $\pm$  SD of two independent biological replicates, each determined in  
822 three technical replicates.

823

824 **Figure 7. SINAP2 acts as an upstream regulator of *NOR*.**

825 **(A)** Schematic presentation of the SINAP2 binding site 1 (BS1) within the *NOR* promoter.  
826 The sequence of the binding site, which is located in the forward strand of the promoter, is  
827 indicated. **(B)** Expression of *NOR* in 3-week-old *SINAP2-IOE* seedlings treated with  
828 estradiol (EST; 15  $\mu$ M) for 6 h compared to ethanol (0.15% [v/v])-treated seedlings (Mock).  
829 Gene expression was determined by qRT-PCR. Data represent means of three biological  
830 replicates. Asterisks indicate significant difference from mock-treated plants (Student's *t*-test;  
831 \*:  $P \leq 0.05$ ). **(C)** ChIP-qPCR shows enrichment of the *NOR* promoter region containing the  
832 SINAP2 binding site 1 (BS1). Mature leaves (no. 3 - 5) harvested from 8-week-old *SINAP2-*  
833 *GPF* plants were used for the ChIP experiment. Values were normalized to the values for  
834 *Solyc04g009030* (promoter lacking a SINAP2 binding site). Data are means  $\pm$  SD of two  
835 independent biological replicates, each performed with three technical replicates.

836

837 **Figure 8. Model for the regulation of leaf senescence by *NOR*.**

838 NOR positively controls leaf senescence in tomato by directly regulating various senescence-  
839 associated genes including, besides others, *SISAG15*, *SISAG113*, *SISGR1* and *SIYLS4*.  
840 Furthermore, the previously reported NAC transcription factor SINAP2 (Ma *et al.*, 2018)  
841 enhances *NOR* expression by directly binding to its promoter. In addition, *NOR* enhances  
842 *SINAP2* expression, suggesting a positively acting feed-forward loop involving the two NAC  
843 factors. *NOR* also directly and positively regulates the expression of the fruit ripening-related  
844 gene *SIERT1B*, consistent with its well-known role in this process.

845

## 846 **Supplemental Data**

847

848 **Table S1. Oligonucleotide sequences.**

849 **Table S2. Data for results shown in heat maps.**

850 **Table S3. Promoters of *NOR* target genes.**

851

852 **Figure S1. Selection of *NOR* transgenic lines.**

853 **(A)** *NOR* expression in *NOR* overexpression lines, *OX-L5* and *OX-L19*, compared to WT.  
854 Expression was analyzed in 3-week-old seedlings. Data are means  $\pm$  SD (n = 3). Significant  
855 differences from WT are indicated by asterisks (Student's *t*-test, \*\*:  $P \leq 0.01$ ). **(B)** Expression  
856 of *NOR* in *NOR-IOE* plants. *NOR* expression was analysed by qRT-PCR in *NOR-IOE* plants  
857 treated with estradiol (15  $\mu$ M) for 6 h, or with ethanol (0.15% [v/v]); Mock). Expression of  
858 *NOR* after EST treatment is significantly higher than in mock-treated plants. Data are from  
859 three biological replicates (Student's *t*-test; \*\*:  $P \leq 0.01$ ).

860

861 **Figure S2. Dark-induced senescence in *ami-NOR* plants.**

862 **(A)** Schematic representation of the *NOR* coding sequence showing the position targeted by  
863 the *amiRNA*. Numbers indicate nucleotide positions relative to the *ATG* start codon. A 21-bp  
864 sequence (TGTACCATAGTTTGAAGGCTG) was targeted towards the *NOR* coding  
865 sequence. Two transgenic *ami-NOR* lines were selected, namely *ami-L2* and *ami-L35*.  
866 Expression was analyzed by end-point PCR amplifying the full-length *NOR* transcript (lower  
867 panel). Note the strong downregulation of *NOR* transcript abundance in the *ami-NOR* lines  
868 compared to wild type (WT). **(B)** Young leaves detached from 10-week-old WT and *ami-L35*  
869 plants after 9 days of dark treatment. Note the less advanced senescence in *ami-L35* compared  
870 to WT. **(C)** Chlorophyll content in leaves of WT and *ami-L35* plants before (Control) and



871 after dark incubation for 9 days (Dark), determined using a SPAD meter. Values represent the  
872 mean  $\pm$  SD of three biological replicates each (Student's *t*-test, \*:  $P \leq 0.05$ ).

873

874 **Figure S3. Identification of the binding sequences of NOR.**

875 **(A)** Binding activities of NOR toward TaNAC69-selected oligonucleotides. Binding activity  
876 is expressed relative to that of S1 (arbitrarily set to 1). The core binding motif is highlighted  
877 in red. RBA, relative binding activity. **(B)** Mutational analysis. Mutated S1 motifs (S1m1 –  
878 S1m17) and mutated S10 motifs (S10m1 and S10m2) were included in the analysis. For base-  
879 substitution analysis, substituted bases in S1 and S16 are shown in lower-case blue letters.  
880 Bases inserted are shown in blue and underlined. Values are means of two assays. The data  
881 indicate CGTR (5-7N) NACG<sup>+</sup>HMWVH and as high-affinity binding sites of NOR (B = CGT;  
882 W = AT; Y = CT; M = AC; H = ACT; V = ACG; N = ACGT). NOR shows more tolerance to  
883 mutation of S1 that contains two core motifs, compared to mutations of S10 which has only  
884 one core motif.

Figure 1

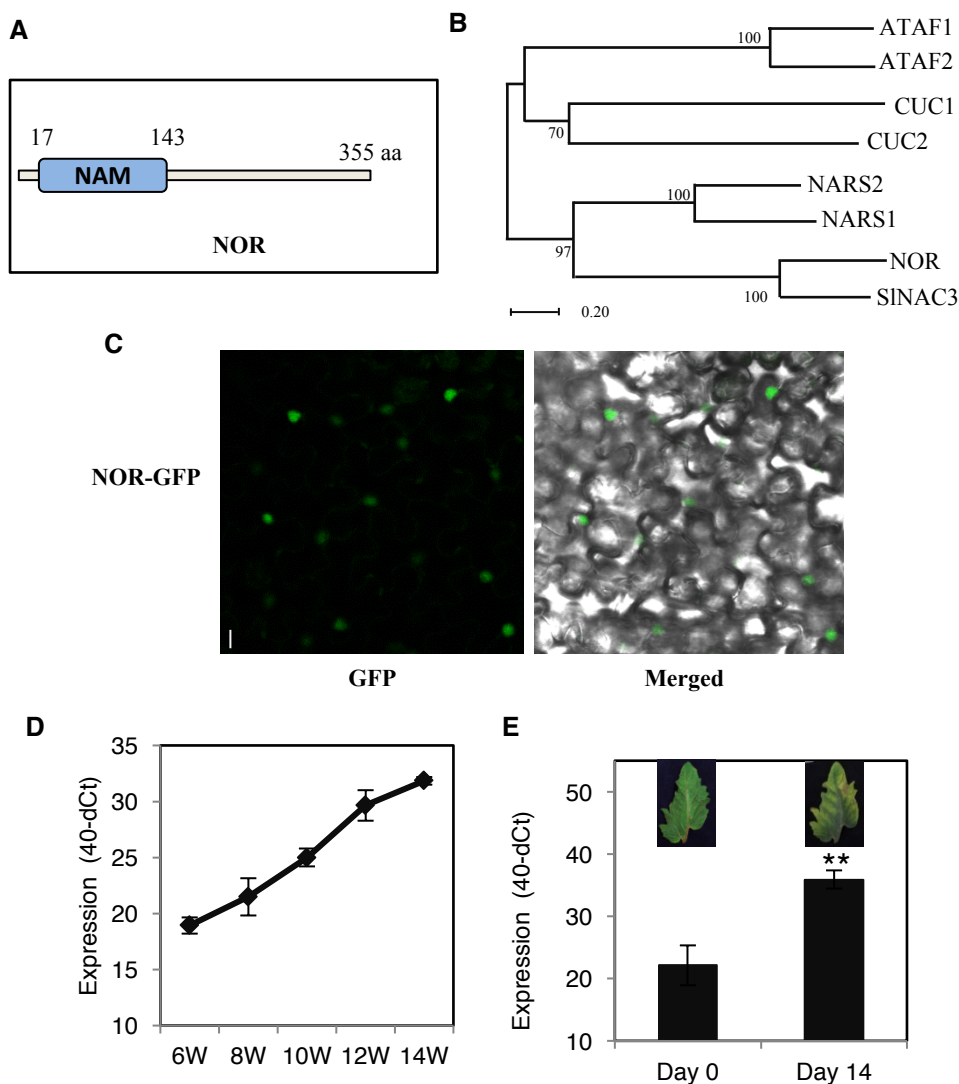

**Figure 1. Subcellular localization of NOR and *NOR* expression during senescence.**

**(A)** Schematic presentation of the NAM domain of NOR. Numbers indicate amino acid positions. **(B)** Phylogenetic analysis of selected NAC proteins. The phylogenetic tree was constructed by MEGA 5.05 software using the neighbor-joining method with the following parameters: bootstrap analysis of 1,000 replicates, Poisson model, and pairwise deletion. NOR and SINAC3 are two tomato TFs and the others are from Arabidopsis. Gene codes of the Arabidopsis TFs are: *ATAF1*, *At1g01720*; *ATAF2*, *At5g08790*; *NARS1*, *At3g15510*; *NARS2*, *At1g52880*; *CUC1*, *At3g15170*; *CUC2*, *At5g53950*. **(C)** Subcellular localization of NOR protein. NOR fused to GFP was visualized in epidermal cells of transgenic tomato plants by confocal laser scan microscopy. Scale bar, 10  $\mu$ m. **(D)** *NOR* transcript level in the 3<sup>rd</sup> true leaf at different developmental stages of tomato wild-type cv. Moneymaker plants. The age of the plants was 6 – 14 weeks (6W - 14W). The y-axis indicates expression level (40-dCt). Data are means  $\pm$  SD of three biological replicates. **(E)** Expression of *NOR* in young detached leaves of 8-week-old WT plants before (day 0) and after 14 days of dark treatment. Leaves were excised from the top part of the stem. Data are means  $\pm$  SD (n = 3). Asterisks denote significant difference from Day 0 (Student's *t*-test, \*\*:  $P \leq 0.01$ ).

Figure 2

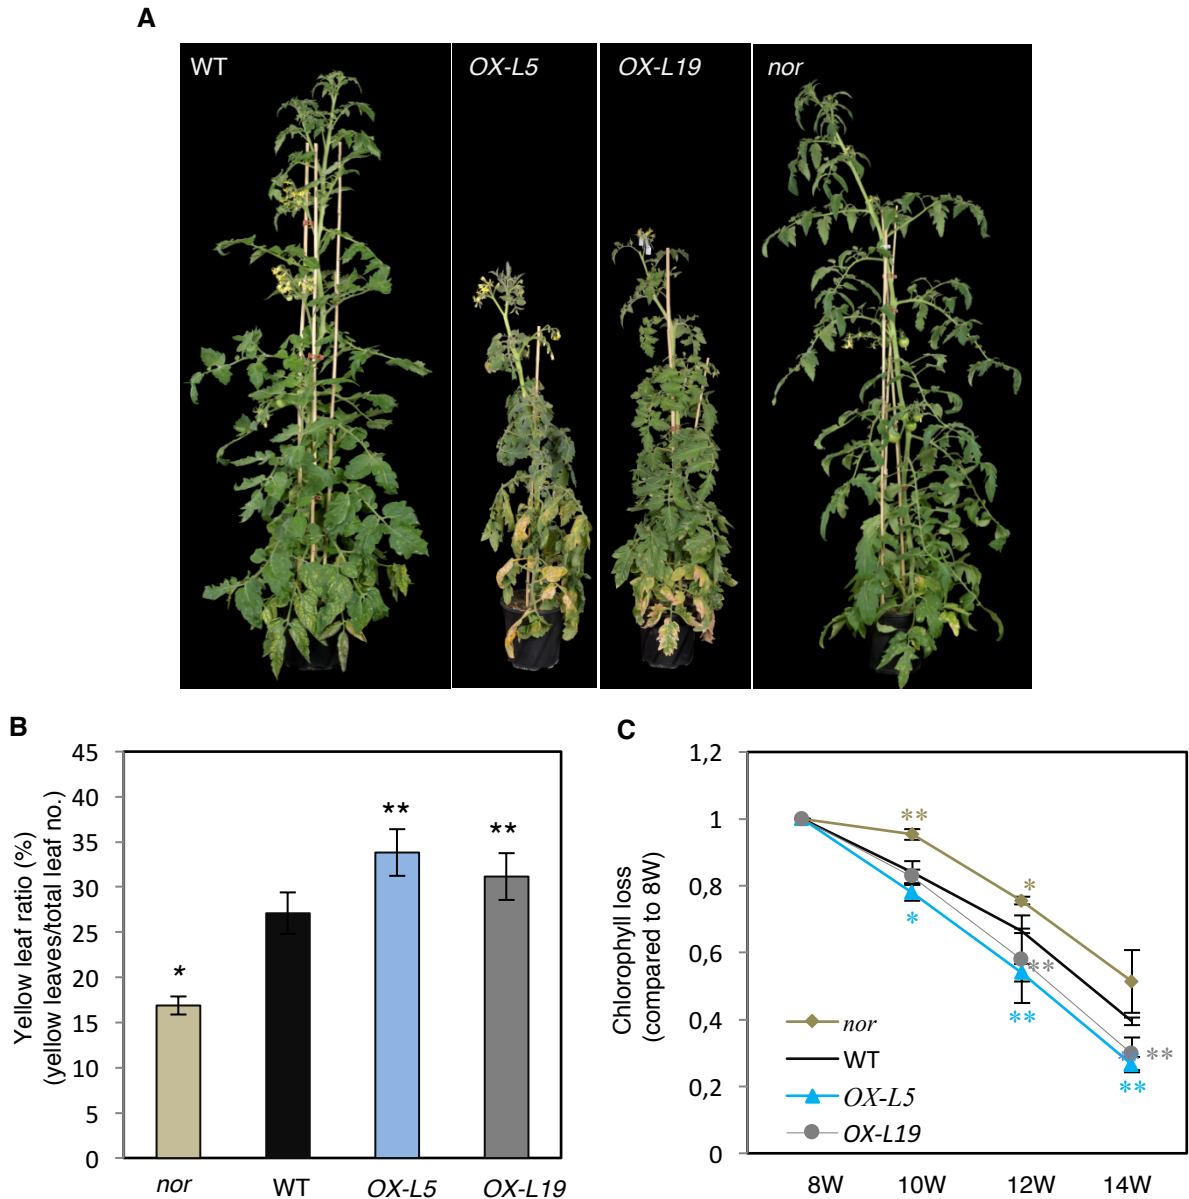

**Figure 2. NOR promotes leaf senescence in tomato.**

**(A)** Phenotype of 12-week-old WT, *OX-L5*, *OX-L19*, and *nor* plants. Note the early leaf senescence in *NOR* overexpressors. **(B)** Yellow leaf ratio of 12-week-old WT, *OX-L5*, *OX-L19*, and *nor* plants. Yellow leaves showing more than 50% yellowing were counted and divided by the total number of leaves. Data are means  $\pm$  SD ( $n = 5$ ). **(C)** Chlorophyll loss of the 3<sup>rd</sup> true leaf (counted from the bottom of the stem) of 8-week- (8W), 10-week- (10W), 12-week- (12W) and 14-week-old (14W) WT, *OX-L5*, *OX-L19*, and *nor* plants. Chlorophyll content was measured by a SPAD meter and at each time point compared to 8W for each genotype (set to 1). Data are means  $\pm$  SD of three biological replicates. Asterisks in (B) and (C) indicate significant differences from WT (Student's *t*-test, \*:  $P \leq 0.05$ ; \*\*:  $P \leq 0.01$ ).

**Figure 3**

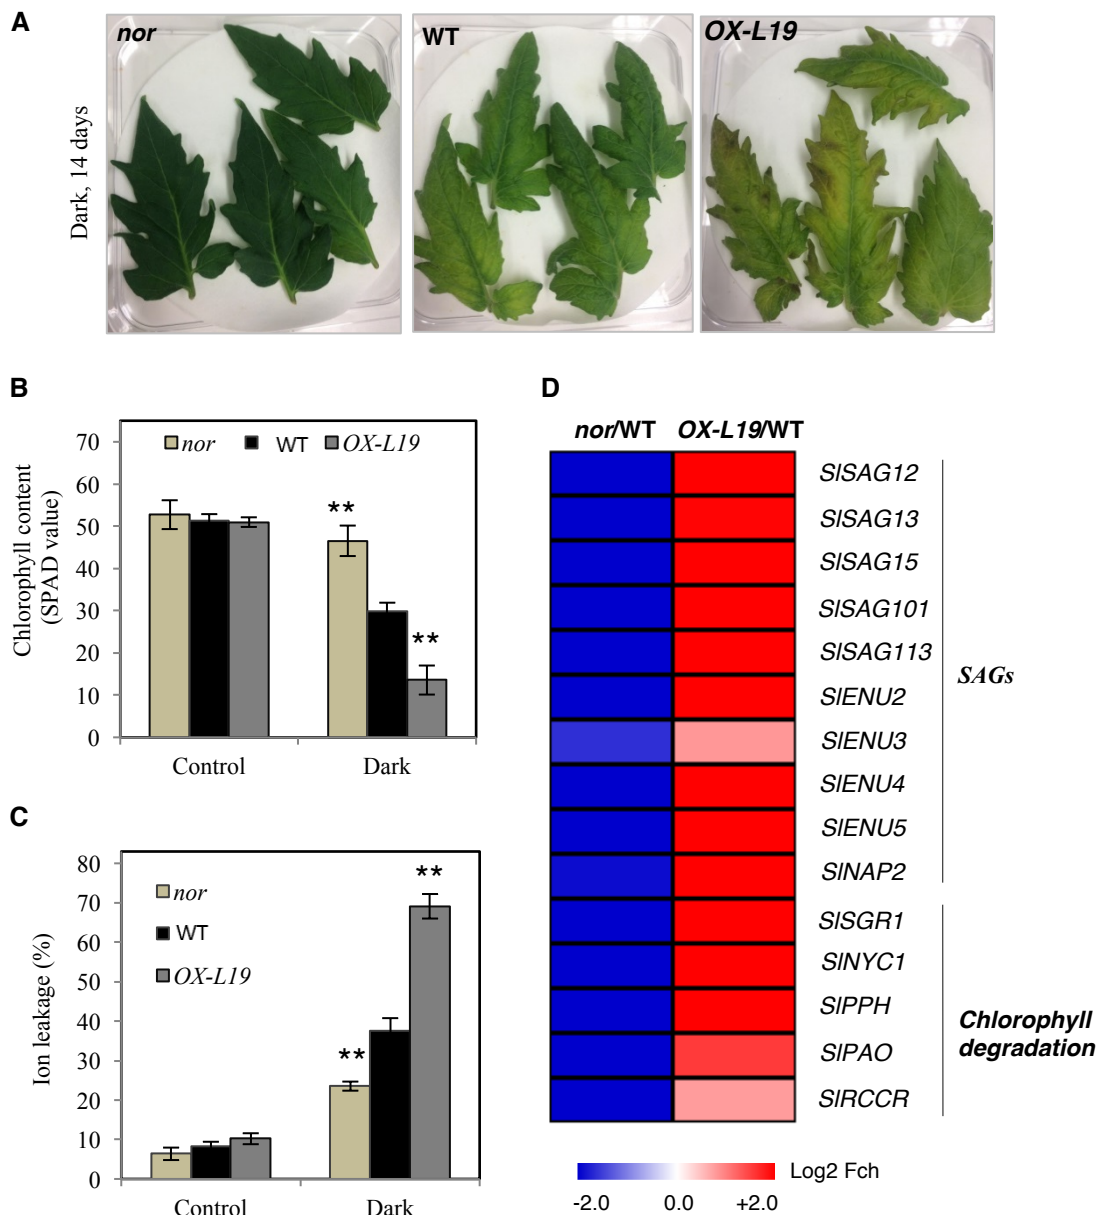

**Figure 3. Dark-induced leaf senescence in *NOR*-modified plants.**

**(A)** Detached leaves of 8-week-old *nor*, WT, and *OX-L19* plants after dark treatment. Young leaves from the top of the stem were detached and subjected to darkness for 14 days (Dark). **(B)** Chlorophyll content of leaves before darkness (control) and of dark-treated leaves. Chlorophyll content was measured using a SPAD meter. **(C)** Ion leakage of leaves before (control) and after dark treatment. **(D)** Heat map showing the fold change ( $\log_2$ ) of the expression of SAGs and chlorophyll degradation genes in detached leaves of 8-week-old plants *nor* and *OX-L19*, after dark treatment, compared to WT. The full data are given in **Table S2**. In ((B) and (C), asterisks indicate significant differences from the WT (Student's *t*-test; \*\*:  $P \leq 0.01$ ).

**Figure 4**

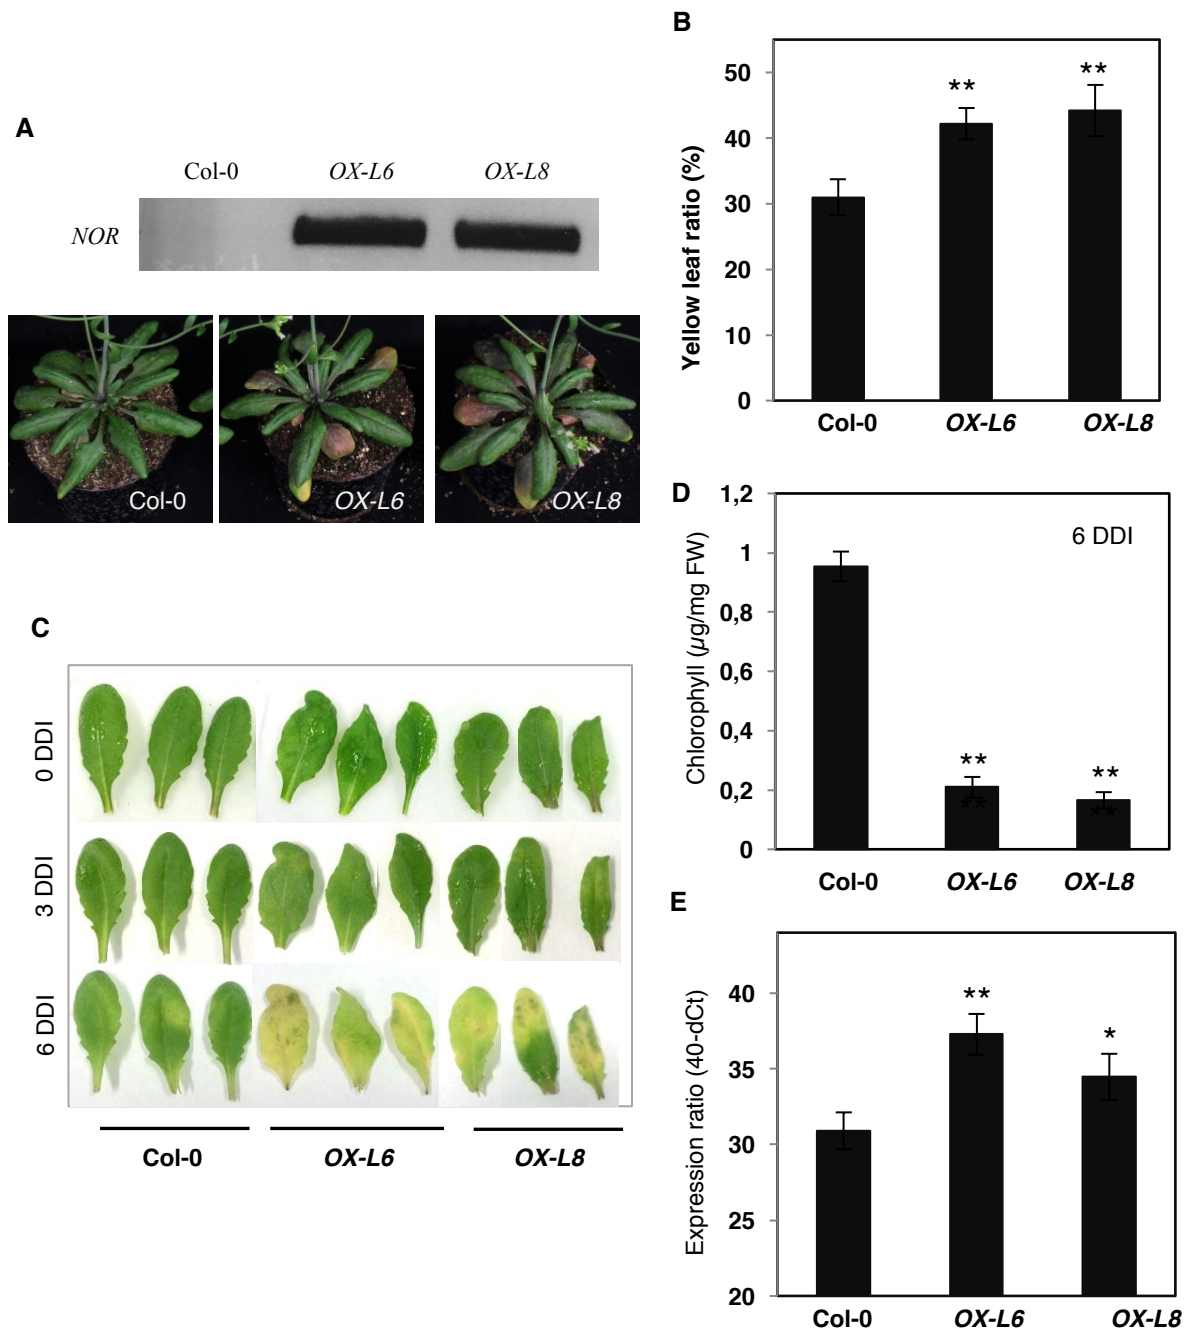

**Figure 4. Overexpressing *NOR* in Arabidopsis promotes leaf senescence.**

**(A)** Phenotype of Arabidopsis Col-0 wild-type and *NOR* overexpression plants. The upper panel shows *NOR* transcript abundance in *OX-L6* and *OX-L8* plants, determined by end-point PCR; as expected, no *NOR* transcript is observed in the Arabidopsis WT. The lower panel shows the phenotype of 5-week-old plants (Col-0 and *NOR* overexpressors). **(B)** Yellow leaf ratio of 5-week-old Col-0, *OX-L6*, and *OX-L8* plants. Yellow leaves showing more than 50% yellowing were counted and compared to the total leaf number. Data are means  $\pm$  SD ( $n = 5$ ). **(C)** Dark-induced senescence. DDI, days after dark incubation. Note the more pronounced senescence in the two *NOR* overexpressors compared to Col-0 at 6 DDI. Leaves no. 5 - 7 were detached from the various plants were used in the experiment. **(D)** Chlorophyll content of (C), at 6 DDI of Col-0, *OX-L6*, and *OX-L8* plants ( $n = 5$ ). **(E)** Expression of *AtSAG12* in detached leaves no. 5 - 7 of Col-0, *OX-L6*, and *OX-L8* plants at 6 DDI. The y-axis indicates expression level (40-dCt). Data are means  $\pm$  SD of three biological replicates. Asterisks in (B), (D) and (E) indicate significant difference from the Col-0 wild type (Student's *t*-test; \*:  $P \leq 0.05$ ; \*\*:  $P \leq 0.01$ ).

**Figure 5**

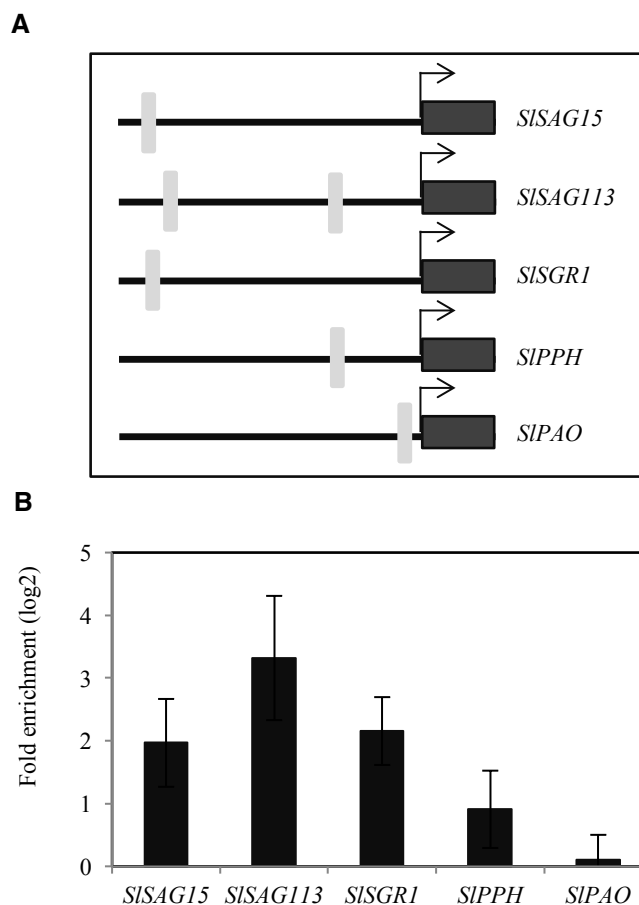

**Figure 5. Direct regulation of SAGs by NOR.**

**(A)** Schematic diagram showing positions of NOR binding sites in 1-kb promoters of selected genes. Arrows indicates the ATG translational start codon. Light-grey boxes indicate the NOR binding sites and black boxes indicate the coding regions of the genes. Sequences of the gene promoters including the NOR binding sites tested in the ChIP experiments are given in **Table S3**. **(B)** ChIP-qPCR shows enrichment of *SISAG15*, *SISAG113*, *SISGR1* and *SIPPH* promoter (1 kb) regions containing the NOR binding site. Eight-week-old *NOR-GFP* plants (mature leaves no. ~3–5) were harvested for the ChIP experiment. qPCR was performed to quantify the enrichment of the promoter regions. In the case of *SISAG113*, which has two potential NOR binding sites in its promoter (see panel A), we tested binding of NOR to the sequence proximal to the ATG start codon. Values were normalized to the values for *Solyc04G009030* (promoter lacking a NOR binding site). Data are the means  $\pm$  SD of two independent biological replicates, each determined in three technical replicates.

**Figure 6**

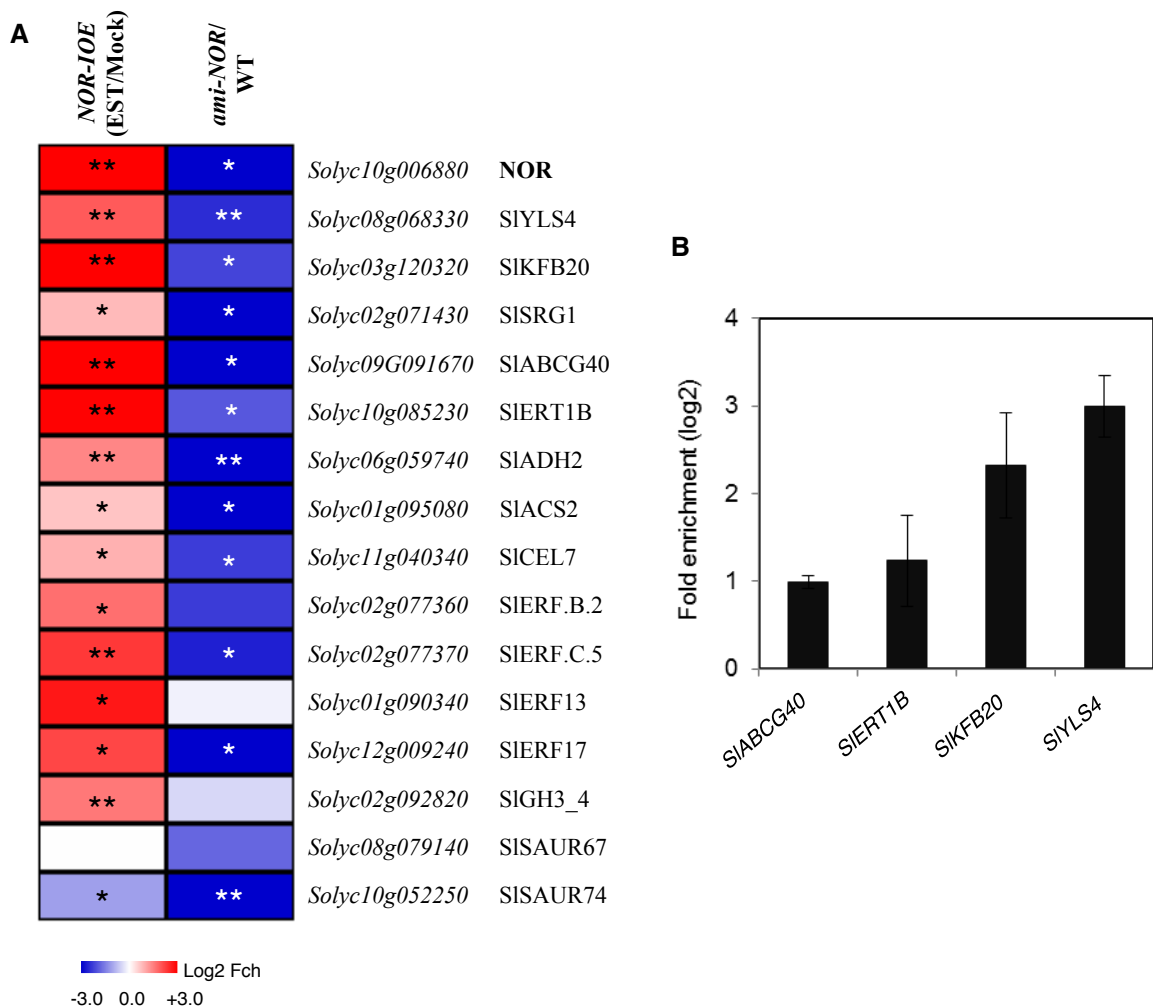

**Figure 6. Heat map of differentially expressed genes in *NOR-IOE* and *ami-NOR* plants.**

**(A)** Gene expression was analyzed by qRT-PCR in *NOR-IOE* seedlings treated with EST (15  $\mu$ M) for 6 h and compared to expression in mock-treated (ethanol, 0.15% [v/v]) seedlings (left column), or in *ami-NOR* seedlings compared to wild-type (WT) seedlings. Seedlings were three weeks old. The color code indicates the log<sub>2</sub> scale of the fold change; blue, downregulated; red, upregulated. Data represent means of three biological replicates. Data are means  $\pm$  SD of three biological replicates. Asterisks indicate significant difference from mock-treated samples (for *NOR-IOE* samples) or from WT (for *ami-NOR* samples). Student's *t*-test; \*:  $P \leq 0.05$ ; \*\*:  $P \leq 0.01$ . The full data are given in **Table S2**. **(B)** ChIP-qPCR shows enrichment of *SIABCG40*, *SIERT1B*, *SIKFB20*, and *SIYLS4* promoter regions containing the NOR binding site within the 1-kb upstream promoter regions of the corresponding genes. Experimental conditions were as described in legend to **Figure 5B**. Data are means  $\pm$  SD of two independent biological replicates, each determined in three technical replicates.

**Figure 7**

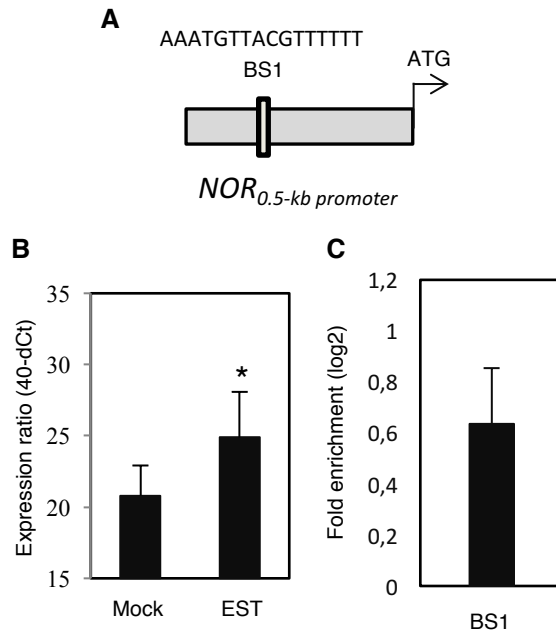

**Figure 7. SINAP2 acts as an upstream regulator of *NOR*.**

**(A)** Schematic presentation of the SINAP2 binding site 1 (BS1) within the *NOR* promoter. The sequence of the binding site, which is located in the forward strand of the promoter, is indicated. **(B)** Expression of *NOR* in 3-week-old *SINAP2-IOE* seedlings treated with estradiol (EST; 15  $\mu$ M) for 6 h compared to ethanol (0.15% [v/v])-treated seedlings (Mock). Gene expression was determined by qRT-PCR. Data represent means of three biological replicates. Asterisks indicate significant difference from mock-treated plants (Student's *t*-test; \*:  $P \leq 0.05$ ). **(C)** ChIP-qPCR shows enrichment of the *NOR* promoter region containing the SINAP2 binding site 1 (BS1). Mature leaves (no. 3 - 5) harvested from 8-week-old *SINAP2-GPF* plants were used for the ChIP experiment. Values were normalized to the values for *Solyc04g009030* (promoter lacking a SINAP2 binding site). Data are means  $\pm$  SD of two independent biological replicates, each performed with three technical replicates.



Figure 8

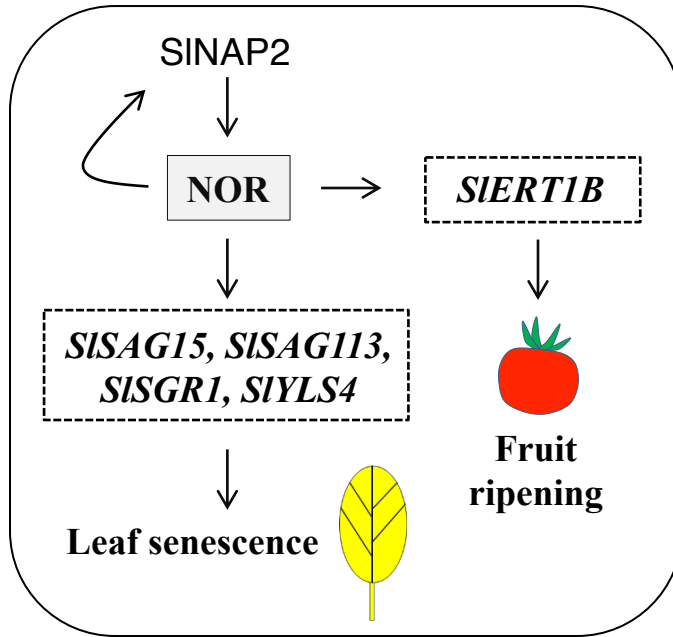

**Figure 8. Model for the regulation of leaf senescence by NOR.**

NOR positively controls leaf senescence in tomato by directly regulating various senescence-associated genes including, besides others, *SISAG15*, *SISAG113*, *SISGR1* and *SIYLS4*. Furthermore, the previously reported NAC transcription factor SINAP2 (Ma *et al.*, 2018) enhances *NOR* expression by directly binding to its promoter. In addition, *NOR* enhances *SINAP2* expression, suggesting a positively acting feed-forward loop involving the two NAC factors. *NOR* also directly and positively regulates the expression of the fruit ripening-related gene *SIERT1B*, consistent with its well-known role in this process.
